# Supplementary material for: Stereoselective Synthesis of a Novel Series of Dispiro-oxindolopyrrolizidines Embodying Thiazolo[3,2-a]benzimidazole Motif: A Molecular Electron Density Theory Study of the Mechanism of the [3 + 2] Cycloaddition Reaction
Source: MDPI journal article supplement (doi:10.3390/chemistry5040158), 2023-11-06
Supplement: s1 [file s1]

# Supporting information

## Stereoselective Synthesis of a Novel Series of Dispiro-oxindolopyrrolizidines Embodying Thiazolo[3,2-a]benzimidazole Motif: A Molecular Electron Density Theory Study of the Mechanism of the [3 + 2] Cycloaddition Reaction

Assem Barakat <sup>1,\*</sup>, Saeed Alshahrani <sup>1</sup>, Abdullah Mohammed Al-Majid <sup>1</sup>, Abdullah Saleh Alamarly <sup>1</sup>, M. Ali <sup>1</sup>, and Mar Ríos-Gutiérrez <sup>2,\*</sup>

<sup>1</sup> Department of Chemistry, College of Science, King Saud University, P.O. Box 2455, Riyadh 11451, Saudi Arabia; chemistry99y@gmail.com (S.A.); amajid@ksu.edu.sa (A.M.A.-M.);

alamary1401@yahoo.com (A.S.A.); maly.c@ksu.edu.sa (M.A)

<sup>2</sup> Department of Organic Chemistry, University of Valencia, Dr. Moliner 50, 46100 Burjassot, Valencia, Spain;

\* Correspondence: ambarakat@ksu.edu.sa (A.B.); m.mar.rios@uv.es (M. R.-G.).

### Index

- S3    **Synthesis of 1*H*-benzo[*d*]imidazole-2-thiol 2**
- S3    **Figure S1:** <sup>1</sup>H-NMR Spectrum of compound (2). (DMSO-*d*<sub>6</sub>)
- S3    **Figure S2:** <sup>13</sup>C-NMR Spectrum of compound (2). (DMSO-*d*<sub>6</sub>)
- S4    **Figure S3:** <sup>1</sup>H-NMR Spectrum of compound (4). (DMSO-*d*<sub>6</sub>)
- S4    **Figure S4:** <sup>13</sup>C-NMR Spectrum of compound (4). (DMSO-*d*<sub>6</sub>)
- S5    **Figure S5:** IR Spectrum of compound (6).
- S5    **Figure S6:** <sup>1</sup>H-NMR Spectrum of compound (6). (DMSO-*d*<sub>6</sub>)
- S6    **Figure S7:** <sup>13</sup>C-NMR Spectrum of compound (6). (DMSO-*d*<sub>6</sub>)
- S6    **Figure S8:** IR Spectrum of compound (7).
- S7    **Figure S9:** <sup>1</sup>H-NMR Spectrum of compound (7). (DMSO-*d*<sub>6</sub>)
- S7    **Figure S10:** <sup>13</sup>C-NMR Spectrum of compound (7). (DMSO-*d*<sub>6</sub>)
- S8    **Figure S11:** <sup>1</sup>H-NMR Spectrum of compound (9a). (DMSO-*d*<sub>6</sub>)
- S8    **Figure S12:** <sup>13</sup>C-NMR Spectrum of compound (9a). (DMSO-*d*<sub>6</sub>)
- S9    **Figure S13:** <sup>1</sup>H-NMR Spectrum of compound (9b). (DMSO-*d*<sub>6</sub>)
- S10    **Figure S14:** <sup>13</sup>C-NMR Spectrum of compound (9b). (DMSO-*d*<sub>6</sub>)

**S10** **Figure S15:** IR Spectrum of compound (**9c**).

**S11** **Figure S16:**  $^1\text{H}$ -NMR Spectrum of compound (**9c**). ( $\text{DMSO-}d_6$ )

**S11** **Figure S17:**  $^{13}\text{C}$ -NMR Spectrum of compound (**9c**). ( $\text{DMSO-}d_6$ )

**S12** **Figure S18:**  $^1\text{H}$ -NMR Spectrum of compound (**9d**). ( $\text{DMSO-}d_6$ )

**S12** **Figure S19:**  $^{13}\text{C}$ -NMR Spectrum of compound (**9d**). ( $\text{DMSO-}d_6$ )

### **S13** Computational Protocol

### **S14** References

**S16** **Table S1** with  $\omega\text{B97X-D/6-311G(d,p)}$  enthalpies, entropies, and Gibbs free energies, and the relative ones with respect to the separated reagents, for the stationary points involved in the 32CA reaction of AY **10a** with chalcone **7**.

**S17** **Figure S20** with  $\omega\text{B97X-D/6-311G(d,p)}$  IRC path associated with the most favourable *ortho/endo* reaction path via **TS-CC-on** in ethanol.

**S18** Cartesian coordinates and electronic energies of the stationary points involved in the 32CA reaction between AY **10a** and chalcone **7** in ethanol. Imaginary frequencies for TSs at 78 °C are included.

### Synthesis of 1*H*-benzo[*d*]imidazole-2-thiol **2**

A mixture of (0.1 mol, 10.8 g) of *o*-phenylenediamine **1**, (0.1 mol, 5.65 g) of potassium hydroxide and (0.1 mol, 7.67 g, 6.19 mL) carbon disulfide, in 90 mL of ethanol in a 250 mL round bottom flask was heated under reflux for 3 h. After completion of heating, reaction mixture was cooled down to room temperature. After that, 100 mL of water were added. The mixture was acidified using diluted acetic acid with stirring. The product was collected by filtration and dried overnight. The dried product was recrystallized from ethanol. White crystals were formed in 96% yield.

#### 1*H*-benzo[*d*]imidazole-2-thiol **2**

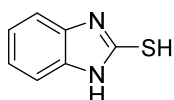

Yield (%): 96; White solid material; m.p.: >250 °C; Molecular Formula: C<sub>7</sub>H<sub>6</sub>N<sub>2</sub>S; [M<sup>+</sup>] m/z : 150; <sup>1</sup>H-NMR (400 MHz, DMSO-*d*<sub>6</sub>) δ 12.52 (s, 2H, overlapped signals, S-H and N-H), 7.09-7.15 (m, 4H, Ar-H); <sup>13</sup>C-NMR (101 MHz, DMSO-*d*<sub>6</sub>) δ 168.7, 132.8, 122.9, 110.0; Anal. for C<sub>7</sub>H<sub>6</sub>N<sub>2</sub>S; calcd: C, 55.98; H, 4.03; N, 18.65 Found: C, 55.92; H, 4.08; N, 18.70.

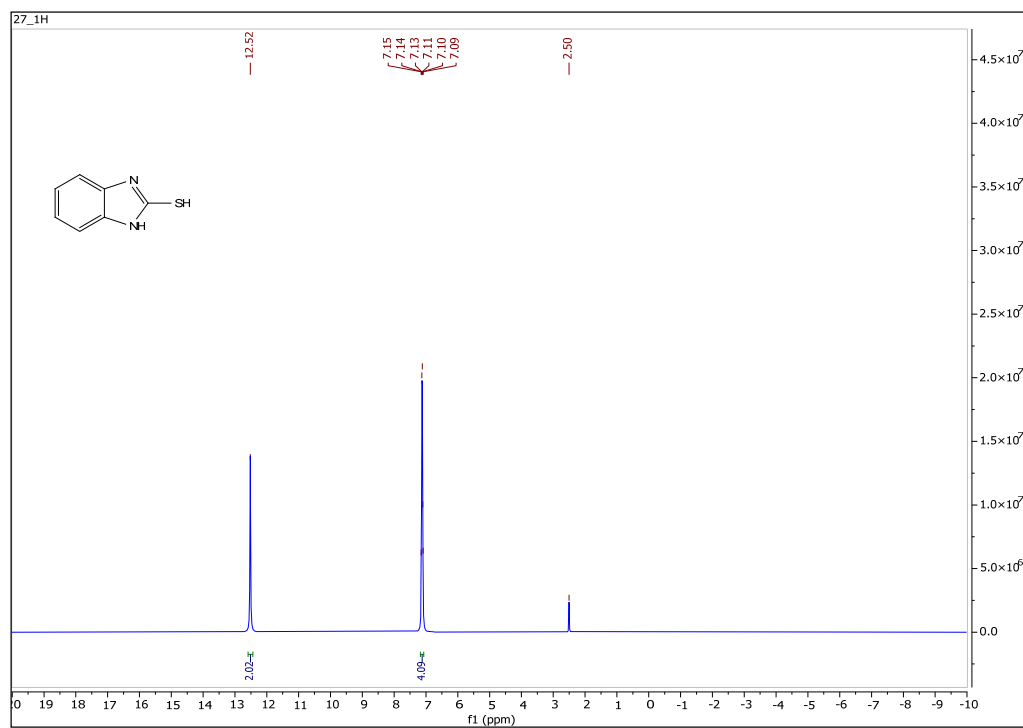

**Figure S1:**  $^1\text{H}$ -NMR Spectrum of compound (2). ( $\text{DMSO}-d_6$ )

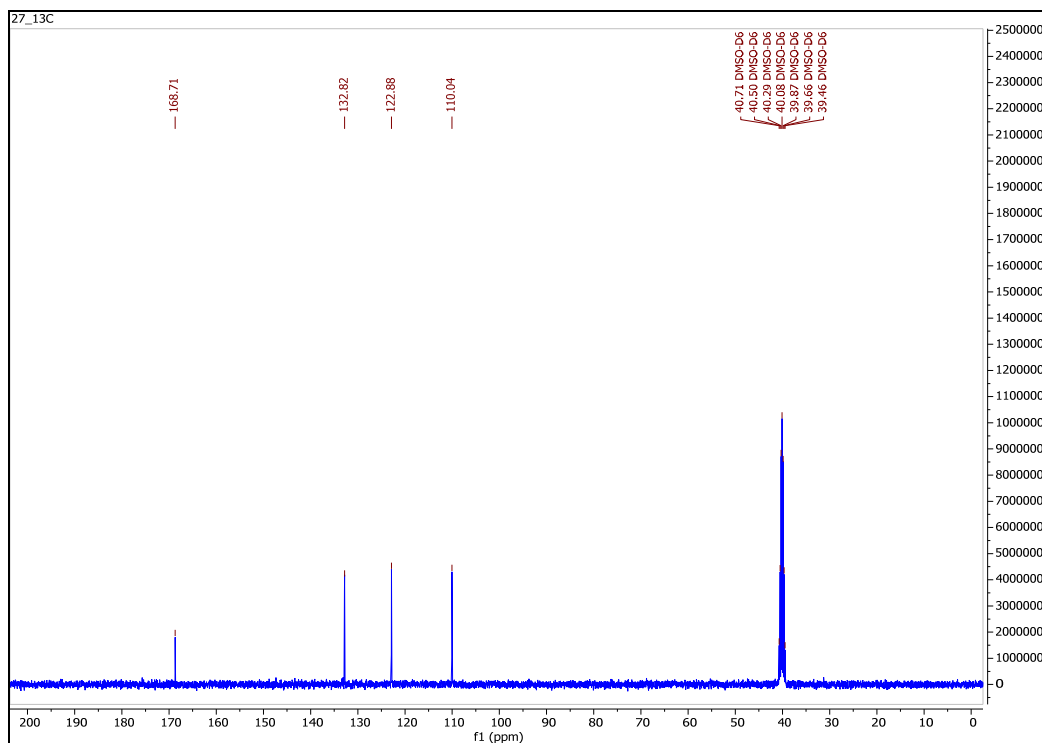

Figure S2: <sup>13</sup>C-NMR Spectrum of compound (2). (DMSO-*d*<sub>6</sub>)

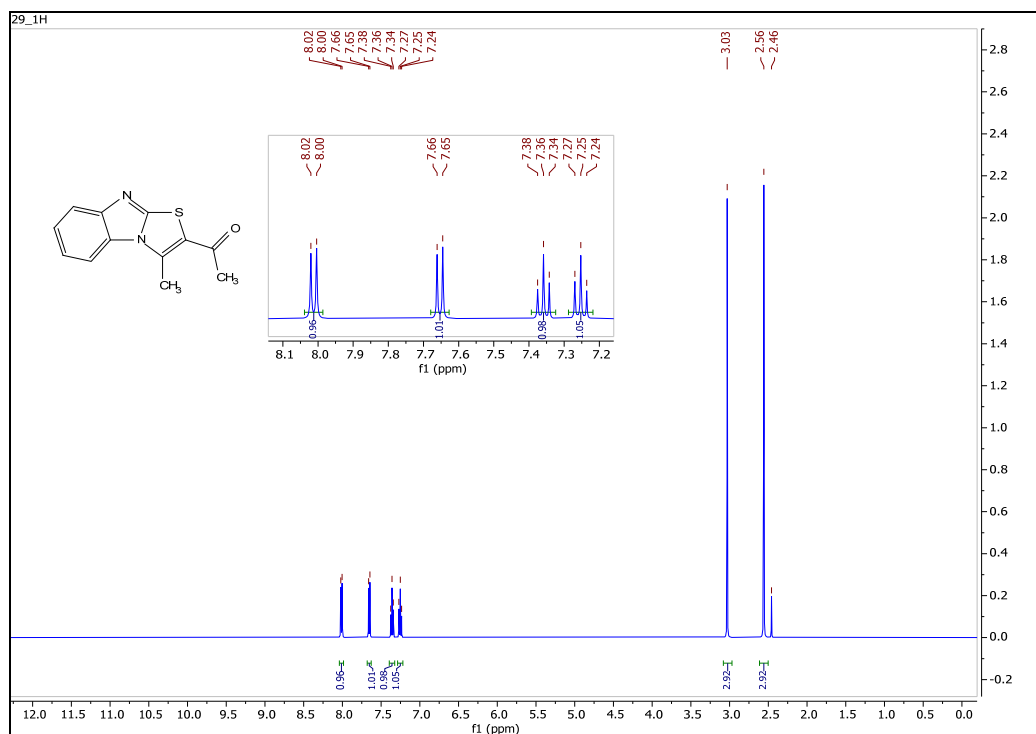

Figure S3: <sup>1</sup>H-NMR Spectrum of compound (4). (DMSO-*d*<sub>6</sub>)

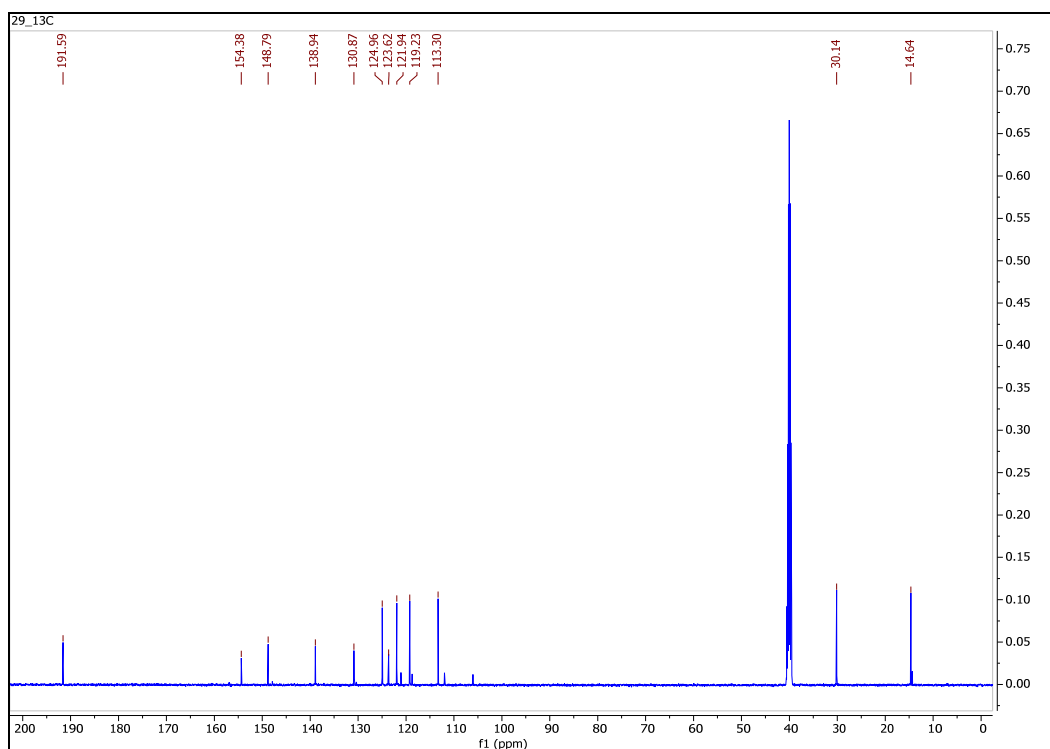

Figure S4: <sup>13</sup>C-NMR Spectrum of compound (4). (DMSO-*d*<sub>6</sub>)

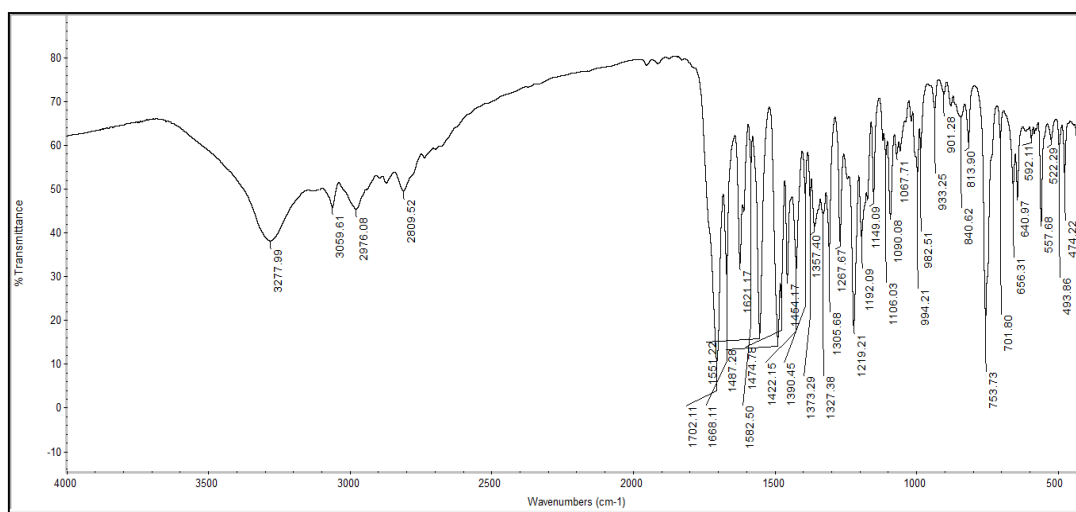

Figure S5: IR Spectrum of compound (6).

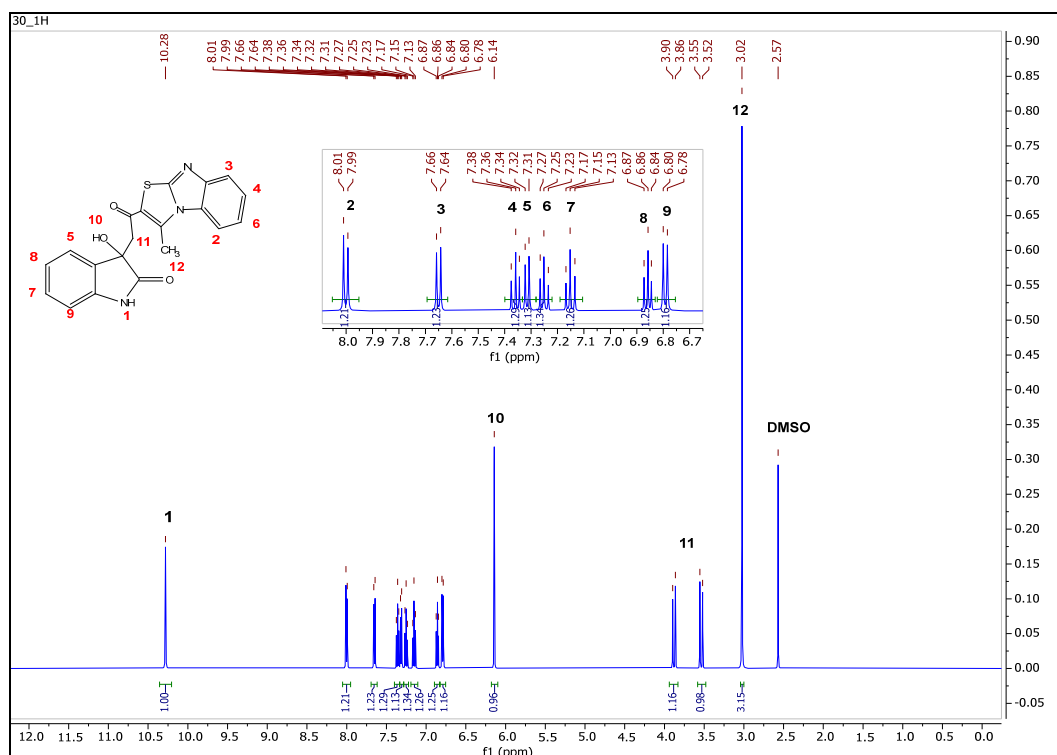

**Figure S6:** <sup>1</sup>H-NMR Spectrum of compound (6). (DMSO-*d*<sub>6</sub>)

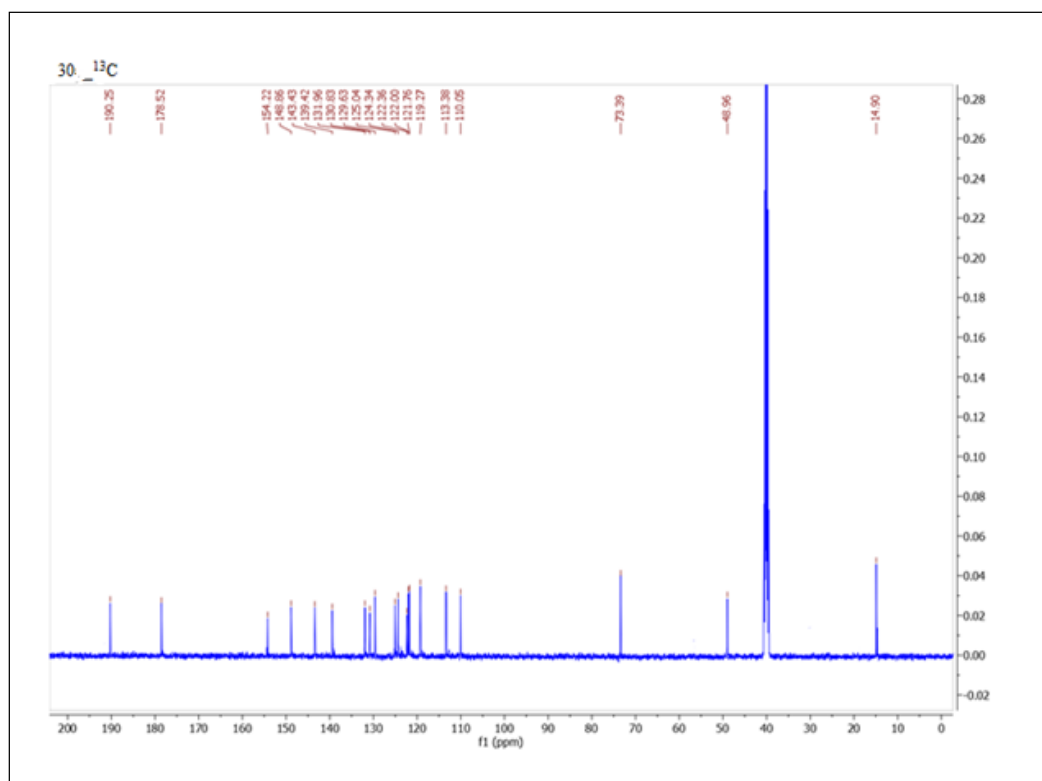

**Figure S7:** <sup>13</sup>C-NMR Spectrum of compound (6). (DMSO-*d*<sub>6</sub>)

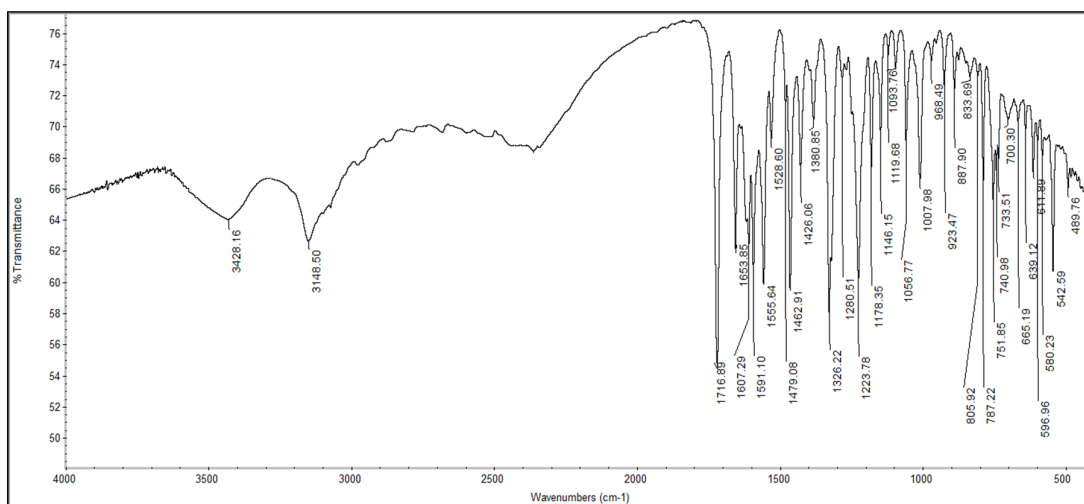

Figure S8: IR Spectrum of compound (7).

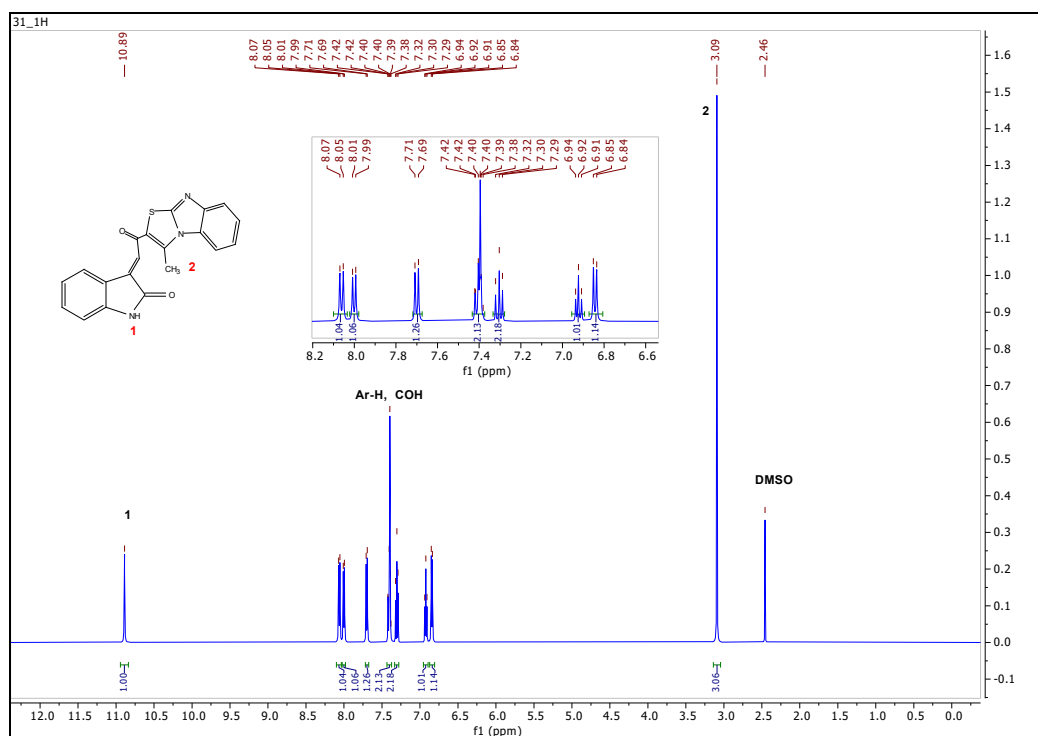

Figure S9:  $^1\text{H}$ -NMR Spectrum of compound (7). ( $\text{DMSO}-d_6$ )



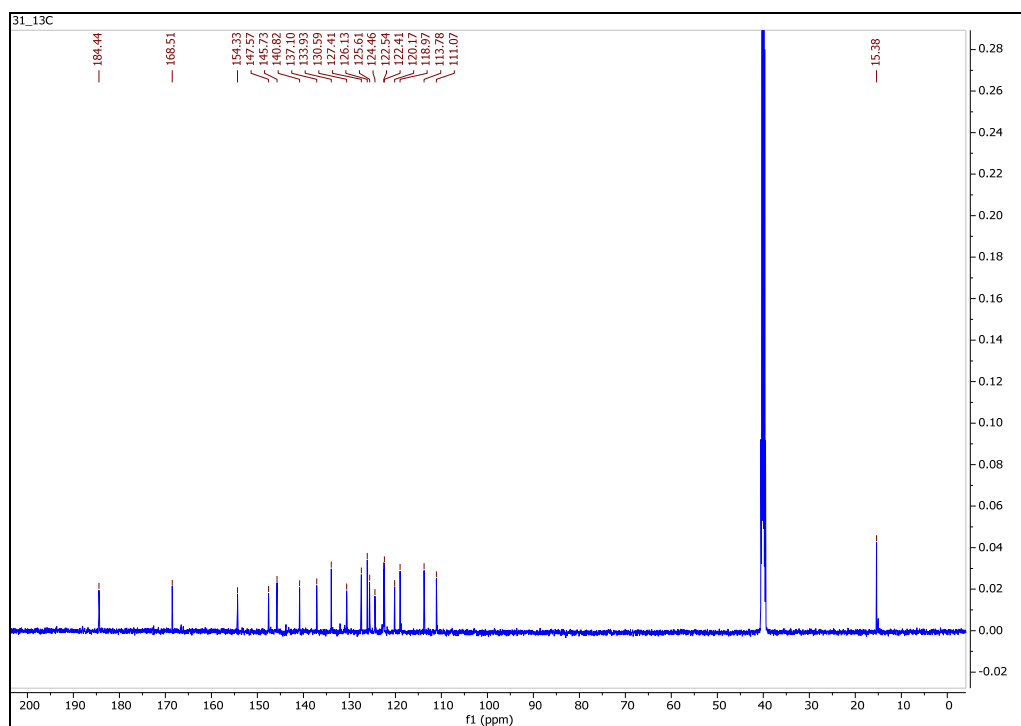

Figure S10: <sup>13</sup>C-NMR Spectrum of compound (7). (DMSO-*d*<sub>6</sub>)

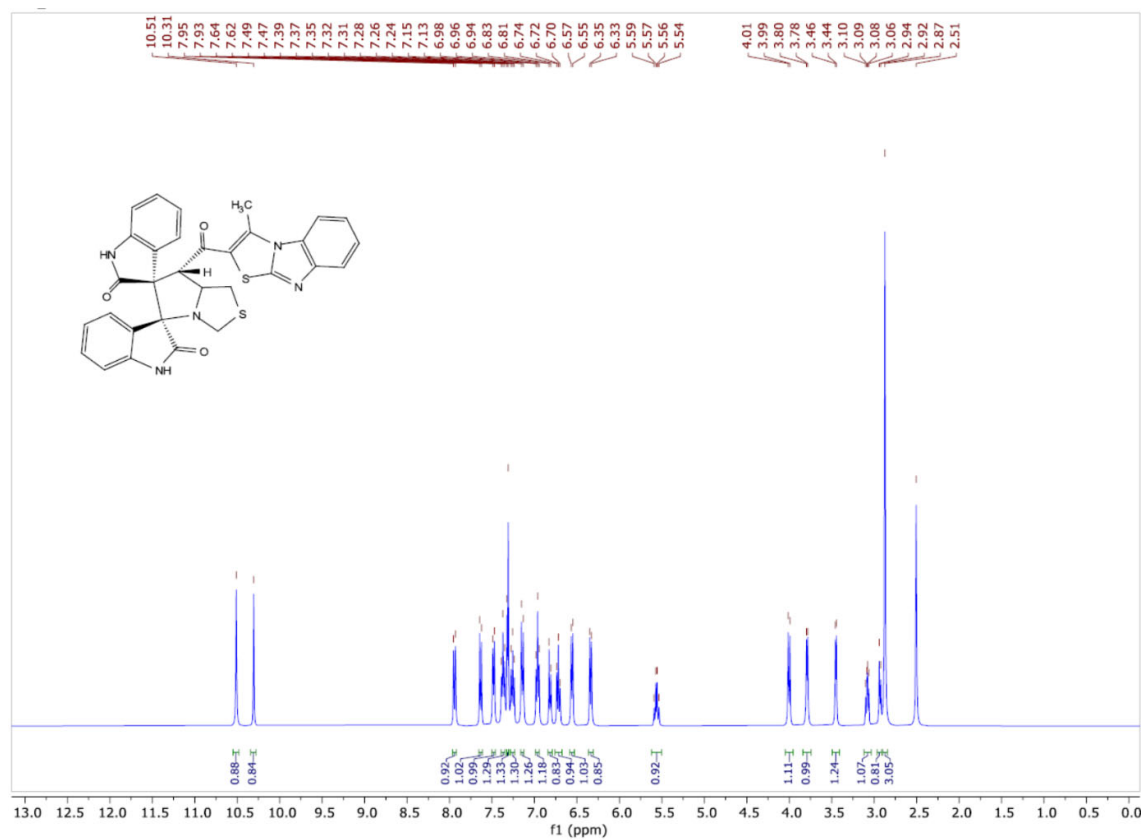

Figure S11: <sup>1</sup>H-NMR Spectrum of compound (9a). (DMSO-*d*<sub>6</sub>)

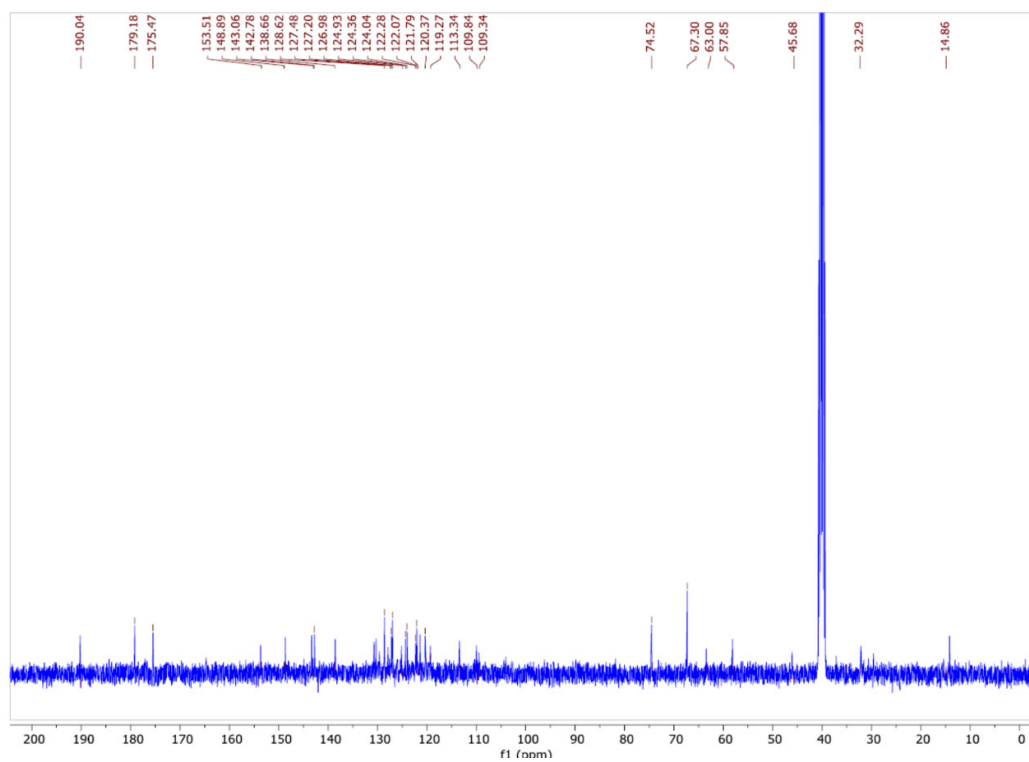

**Figure S12:** <sup>13</sup>C-NMR Spectrum of compound (9a). (DMSO-*d*<sub>6</sub>)

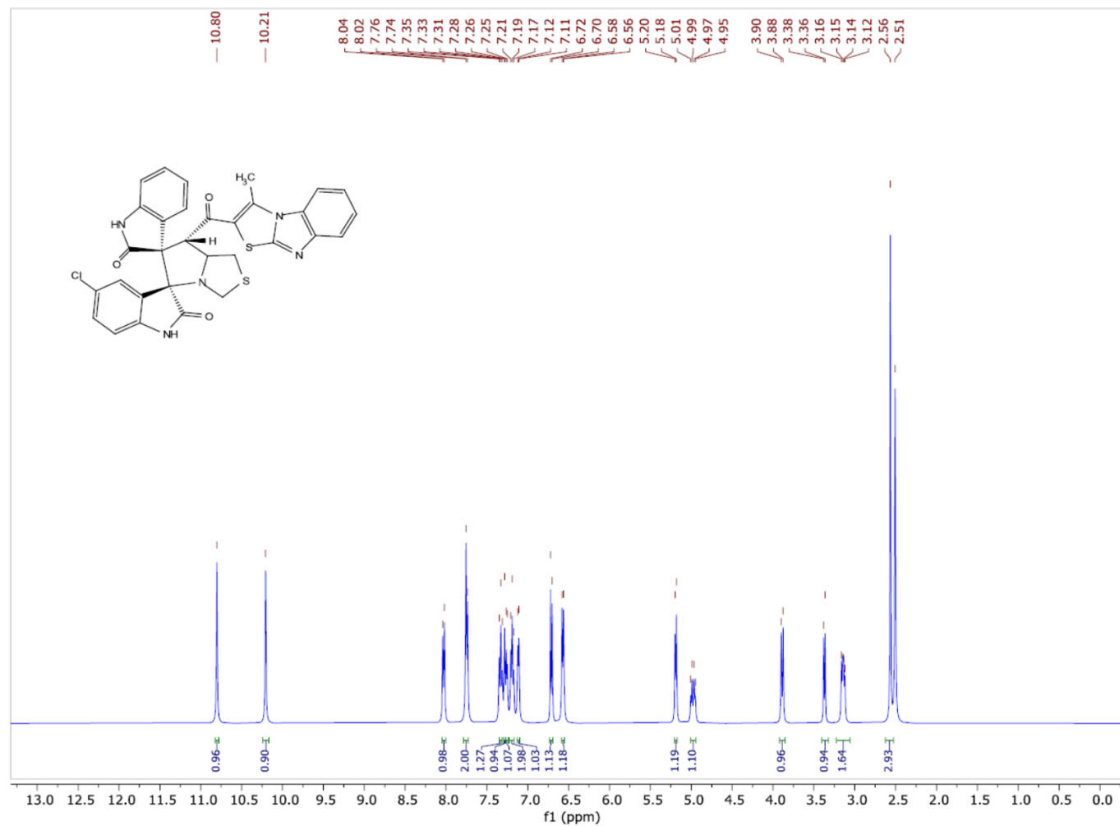

**Figure S13:**  $^1\text{H}$ -NMR Spectrum of compound (**9b**). ( $\text{DMSO}-d_6$ )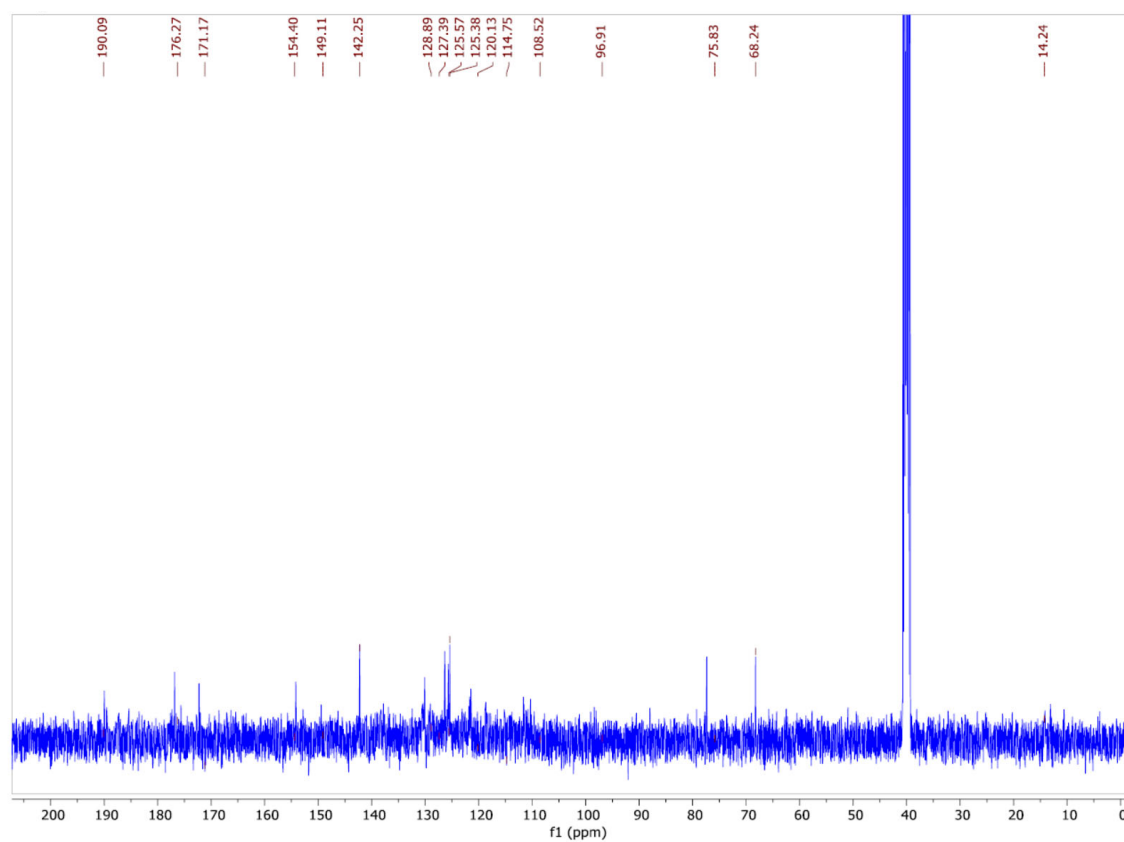**Figure S14:**  $^{13}\text{C}$ -NMR Spectrum of compound (**9b**). ( $\text{DMSO}-d_6$ )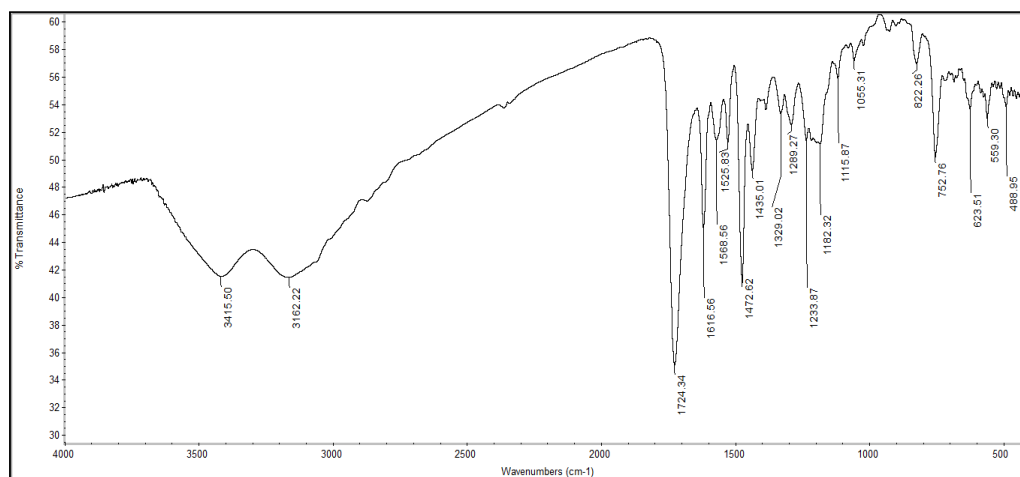**Figure S15:** IR Spectrum of compound (**9c**).

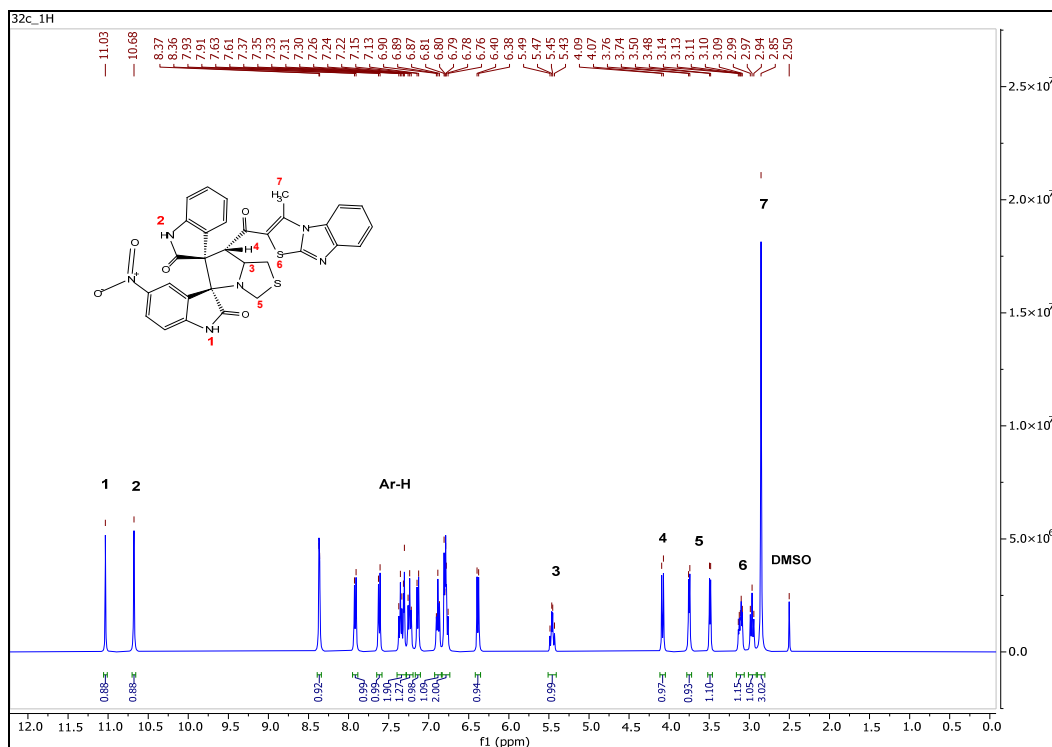

Figure S16:  $^1\text{H}$ -NMR Spectrum of compound (9c). (DMSO- $d_6$ )

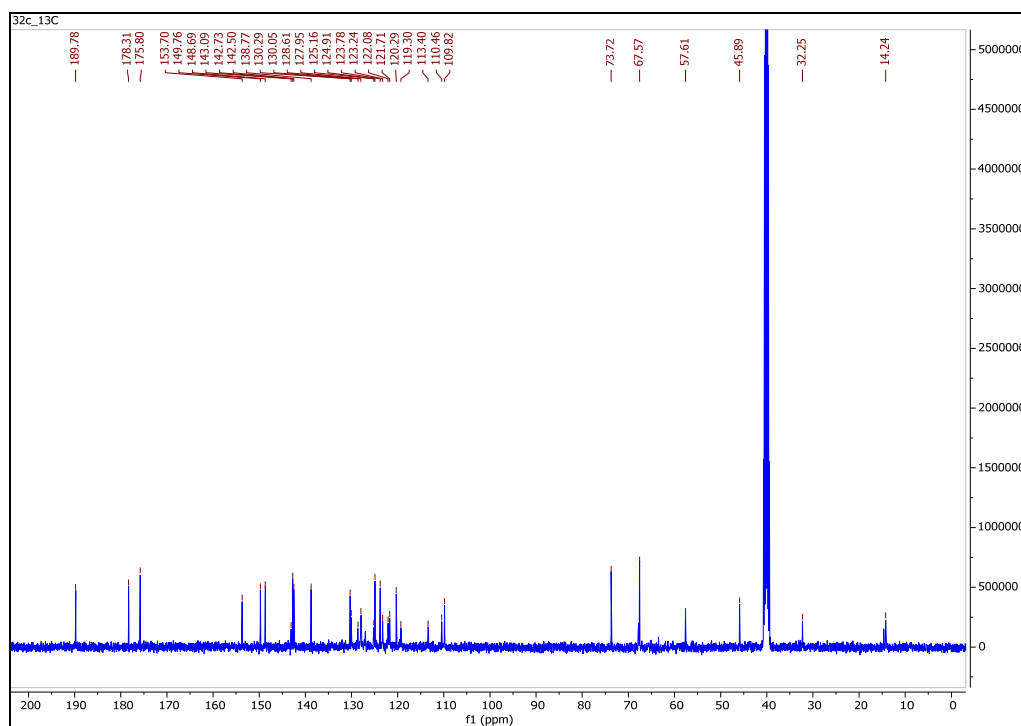

Figure S17:  $^{13}\text{C}$ -NMR Spectrum of compound (9c). (DMSO- $d_6$ )

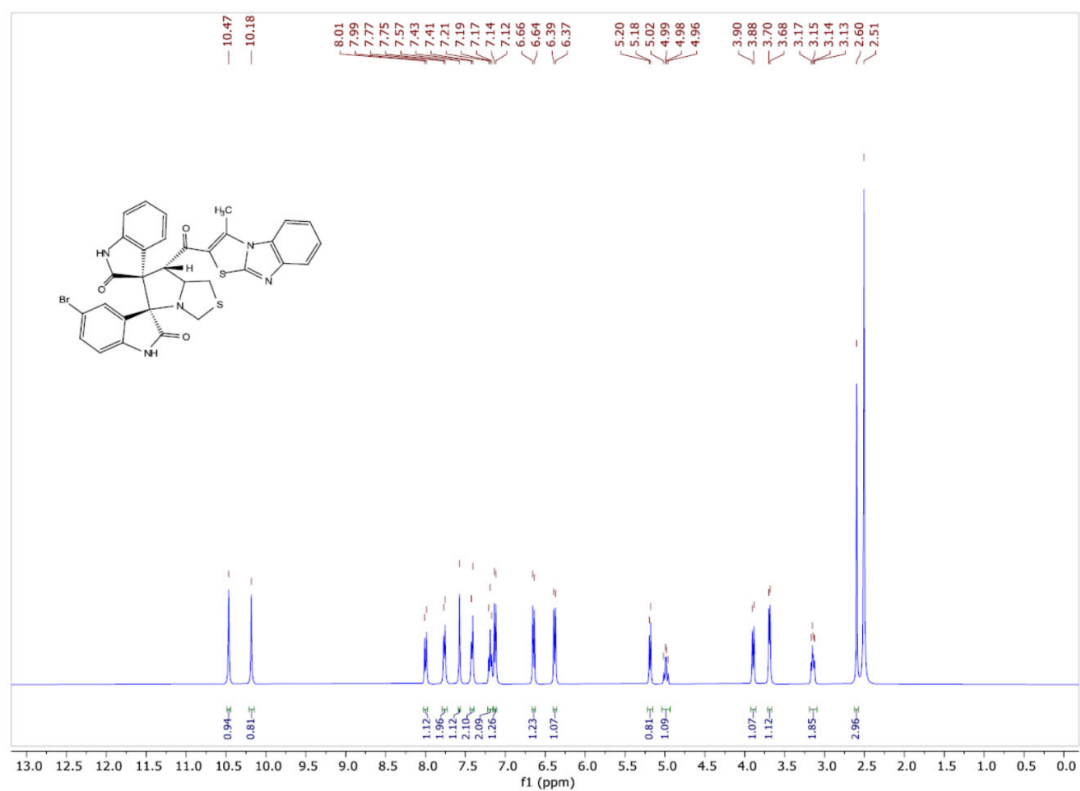

Figure S18:  $^1\text{H}$ -NMR Spectrum of compound (9d). (DMSO- $d_6$ )

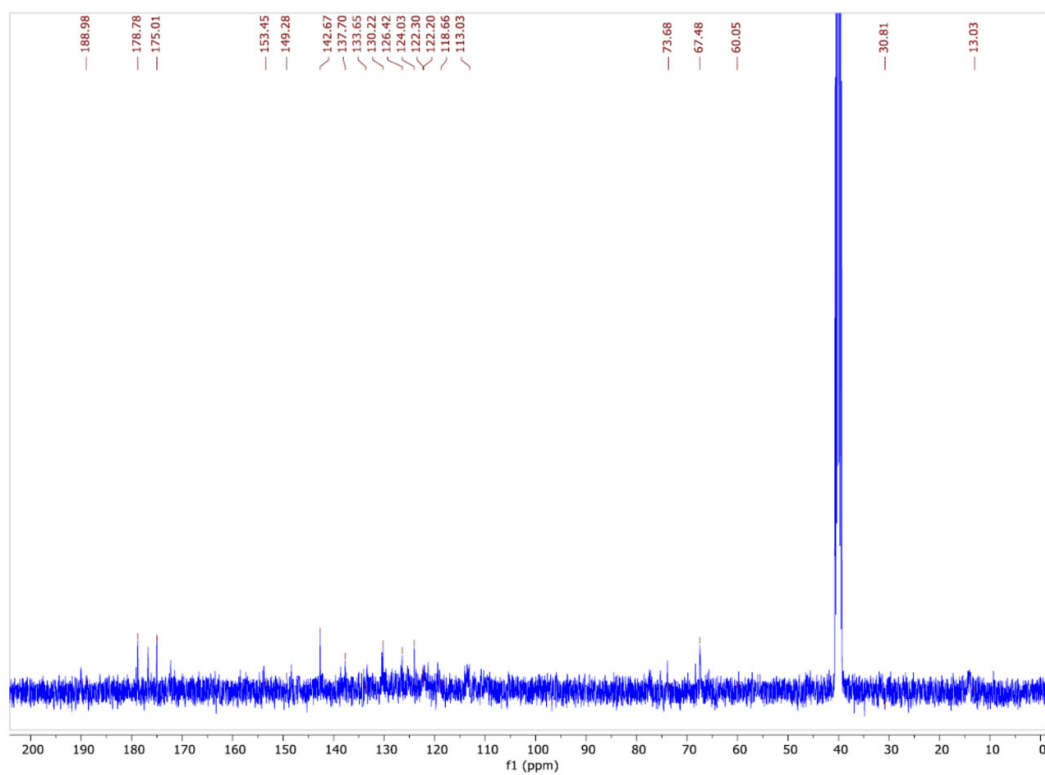

Figure S19:  $^{13}\text{C}$ -NMR Spectrum of compound (9d). (DMSO- $d_6$ )

## Computational Protocol

All calculations were performed using the  $\omega$ B97X-D [1] functional together with the standard 6-311G(d,p) [2] basis set. This functional includes long-range exchange and semi classical London dispersion corrections, and has demonstrated to be an efficient method in the study of organic reactions. [3] The TSs were characterized by the presence of only one imaginary frequency. The Berny method was used in optimizations. [4,5] The intrinsic reaction coordinates (IRC) paths [6] were traced to obtain the energy profiles connecting each TS to the two associated minima in the potential energy surface using the Hratchian-Schlegel Hessian-based Predictor-Corrector integrator. [7-9]

Solvent effects of ethanol in the thermodynamic calculations were taken into account by full optimization of the gas-phase structures at the same computational level using the polarizable continuum model (PCM) [10,11] in the framework of the self-consistent reaction field (SCRF). [12-14] Values of  $\omega$ B97X-D/6-311G(d,p) enthalpies, entropies, and Gibbs free energies in ethanol were calculated with standard statistical thermodynamics at 78 °C and 1 atm [2] by PCM frequency calculations at the solvent-optimized structures.

The GEDT [15] values were computed using the equation  $\text{GEDT}(f) = \sum q_f$ , where  $q$  are the natural charges [16,17] of the atoms belonging to one of the two frameworks ( $f$ ) at the TS geometries. Quantum chemical reactivity indices [18,19] were calculated using the equations in reference 19.

The Gaussian 16 suite of programs was used to perform the calculations. [20] Molecular geometries were visualized by using the GaussView program. [21]

## References

1. Chai, J.-D.; Head-Gordon, M. Long-range corrected hybrid density functionals with damped atom–atom dispersion corrections. *Phys. Chem. Chem. Phys.* **2008**, *10*, 6615–6620.
2. Hehre, M.J.; Radom, L.; Schleyer, P.v.R.; Pople, J. *Ab initio Molecular Orbital Theory*, Wiley, New York, 1986.
3. Domingo, L.R.; Pérez. Lithium cation-catalyzed benzene Diels–Alder reaction: Insights on the molecular mechanism within the Molecular Electron Density Theory. *J. Org. Chem.* **2020**, *85*, 13121–13132.
4. Schlegel, H.B. Optimization of equilibrium geometries and transition structures. *J. Comput. Chem.* **1982**, *3*, 214–218.
5. Schlegel, H.B. In *modern electronic structure theory*, Yarkony, D.R., Ed., World Scientific Publishing, Singapore, 1994.
6. Fukui, K. Formulation of the reaction coordinate. *J. Phys. Chem.* **1970**, *74*, 4161–4163.
7. Hratchian, H.P.; Schlegel, H. B. in *Theory and Applications of Computational Chemistry: The First 40 Years*, Elsevier, Amsterdam, **2005**, pp. 195–249.
8. Hratchian, H.P.; Schlegel, H. B. Accurate reaction paths using a Hessian based predictor–corrector integrator, *J. Chem. Phys.* **2004**, *120*, 9918–9924.
9. Hratchian, H.P.; Schlegel, H. B. Using Hessian Updating To Increase the Efficiency of a Hessian Based Predictor-Corrector Reaction Path Following Method, *J. Chem. Theory Comput.* **2005**, *1*, 61–69.
10. Tomasi, J.; Persico, M. Molecular interactions in solution: and overview of methods based on continuous distributions of the solvent. *Chem. Rev.* **1994**, *94*, 2027–2094.
11. Simkin, B.Ya.; Sheikhet, I.I. *Quantum chemical and statistical theory of solutions–computational approach*, Ellis Horwood: London, 1995.
12. Cossi, M.; Barone, V.; Cammi, R.; Tomasi, J. Ab initio study of solvated molecules: A new implementation of the polarizable continuum model. *Chem. Phys. Lett.* **1996**, *255*, 327–335.
13. Cancès, E.; Mennucci, B.; Tomasi, J. A new integral equation formalism for the polarizable continuum model: Theoretical background and applications to isotropic and anisotropic dielectrics. *J. Chem. Phys.* **1997**, *107*, 3032–3041.
14. Barone, V.; Cossi, M.; Tomasi, J. Geometry optimization of molecular structures in solution by the polarizable continuum model. *J. Comput. Chem.* **1998**, *19*, 404–417.

15. Domingo, L.R. A new C-C bond formation model based on the quantum chemical topology of electron density. *RSC Adv.* **2014**, *4*, 32415-32428.
16. Reed, A.E.; Weinstock, R.B.; Weinhold, F. Natural population analysis. *J. Chem. Phys.* **1985**, *83*, 735-746.
17. Reed, A.E.; Curtiss, L.A.; Weinhold, F. Intermolecular interactions from a natural bond orbital, donor-acceptor viewpoint. *Chem. Rev.* **1988**, *88*, 899-926.
18. Parr, R.G.; Yang, W. *Density functional theory of atoms and molecules*, Oxford University Press, New York, 1989.
19. Domingo, L.R.; Ríos-Gutiérrez, M.; Pérez, P. Applications of the conceptual density functional indices to organic chemistry reactivity. *Molecules* **2016**, *21*, 748.
20. Gaussian 16, Revision A.03, Frisch, M.J.; Trucks, G.W.; Schlegel, H.B.; Scuseria, G.E.; Robb, M.A.; Cheeseman, J.R.; Scalmani, G.; Barone, V.; Petersson, G. A.; Nakatsuji, H.; et al. Gaussian, Inc., Wallingford CT, **2016**.
21. GaussView, Version 6.0, Dennington, R.; Keith, T.A.; Millam, J.M., Semichem Inc., Shawnee Mission, KS, **2016**.



**Table S1.**  $\omega$ B97X-D/6-311G(d,p) enthalpies (H, in kcal·mol<sup>-1</sup>), entropies (S, in cal·mol<sup>-1</sup>·K<sup>-1</sup>) and Gibbs free energies (G, in kcal·mol<sup>-1</sup>), and the relative ones with respect to the separated reagents ( $\Delta$ H,  $\Delta$ S and  $\Delta$ G), computed at 78 °C and 1 atm in ethanol, for the stationary points involved in the 32CA reaction of AY **10a** with chalcone **7**.

|                   | H            | $\Delta$ H | S       | $\Delta$ S | G            | $\Delta$ G |
|-------------------|--------------|------------|---------|------------|--------------|------------|
| chalcone <b>7</b> | -1482.453114 |            | 165.705 |            | -1482.545940 |            |
| AY <b>10a</b>     | -1007.834257 |            | 117.964 |            | -1007.900338 | 0.0        |
| MC-CC-mn          | -2490.320010 | -20.5      | 236.227 | -47.4      | -2490.452340 | -3.8       |
| TS-CC-on          | -2490.309517 | -13.9      | 230.490 | -53.2      | -2490.438634 | 4.8        |
| TS-CC-ox          | -2490.303704 | -10.2      | 229.317 | -54.4      | -2490.432164 | 8.9        |
| TS-CC-mn          | -2490.310307 | -14.4      | 226.091 | -57.6      | -2490.436959 | 5.8        |
| TS-CC-mx          | -2490.305699 | -11.5      | 227.594 | -56.1      | -2490.433194 | 8.2        |
| TS-CO-on          | -2490.298576 | -7.0       | 227.213 | -56.5      | -2490.425856 | 12.8       |
| TS-CO-ox          | -2490.296157 | -5.5       | 226.092 | -57.6      | -2490.422810 | 14.7       |
| TS-CO-mn          | -2490.281194 | 3.9        | 230.491 | -53.2      | -2490.410311 | 22.6       |
| TS-CO-mx          | -2490.285077 | 1.4        | 230.980 | -52.7      | -2490.414468 | 20.0       |
| <b>9a</b>         | -2490.358521 | -44.6      | 224.110 | -59.6      | -2490.484064 | -23.7      |
| <b>11a</b>        | -2490.345111 | -36.2      | 222.316 | -61.4      | -2490.469648 | -14.7      |
| <b>12a</b>        | -2490.358734 | -44.8      | 222.848 | -60.8      | -2490.483570 | -23.4      |
| <b>13a</b>        | -2490.363843 | -48.0      | 226.686 | -57.0      | -2490.490828 | -28.0      |
| <b>14a</b>        | -2490.326760 | -24.7      | 227.522 | -56.1      | -2490.454213 | -5.0       |
| <b>15a</b>        | -2490.326907 | -24.8      | 227.169 | -56.5      | -2490.454163 | -4.9       |
| <b>16a</b>        | -2490.323562 | -22.7      | 230.565 | -53.1      | -2490.452721 | -4.0       |
| <b>17a</b>        | -2490.325136 | -23.7      | 227.833 | -55.8      | -2490.452765 | -4.1       |

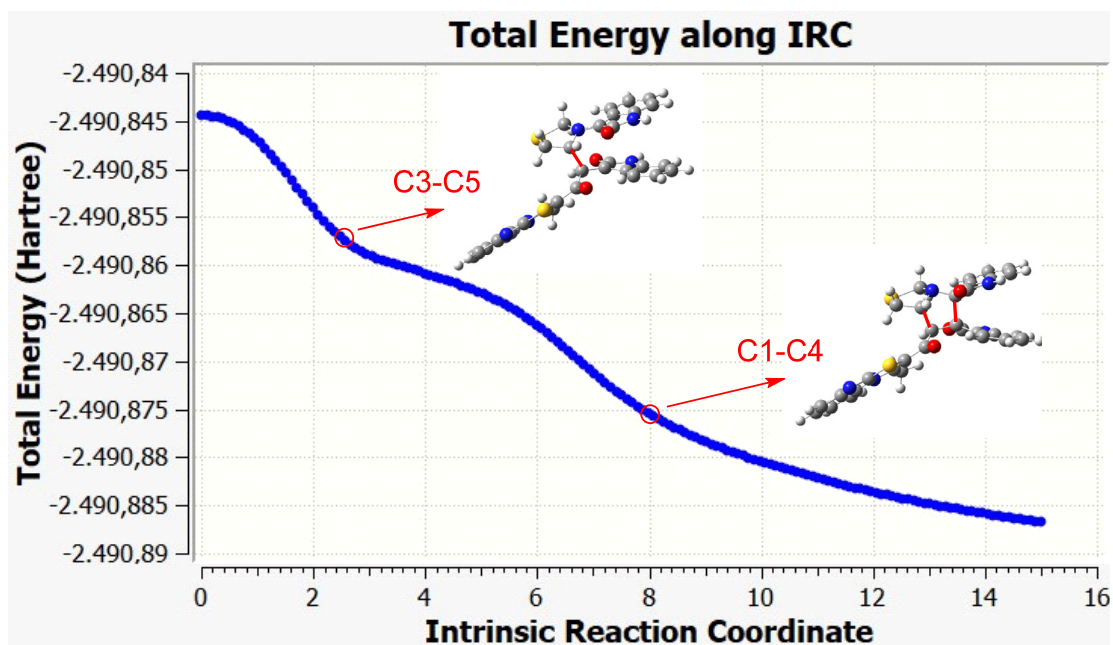

**Figure S20.**  $\omega$ B97X-D/6-311G(d,p) IRC path associated with the most favourable *ortho/endo* reaction path via **TS-CC-on** in ethanol.

Cartesian coordinates and electronic energies of the stationary points involved in the 32CA reaction between AY **10a** and chalcone **7** in ethanol. Imaginary frequencies for TSs at 78 °C are included.

Chalcone **7**

E(RwB97XD) = -1482.77380792 A.U.

|    |           |           |           |
|----|-----------|-----------|-----------|
| 6  | -1.574396 | 0.395625  | -0.878872 |
| 1  | -1.068688 | 1.232315  | -1.351703 |
| 6  | -0.793564 | -0.847586 | -0.695542 |
| 8  | -1.303503 | -1.954294 | -0.776049 |
| 6  | 3.988349  | 0.510076  | 0.297344  |
| 6  | 4.911184  | -0.543918 | 0.129474  |
| 6  | 3.029530  | -1.385913 | -0.335218 |
| 6  | 0.653822  | -0.737428 | -0.483673 |
| 6  | 1.428596  | 0.304878  | -0.071505 |
| 6  | 6.268113  | -0.315756 | 0.356070  |
| 6  | 6.661921  | 0.956018  | 0.738619  |
| 1  | 7.711354  | 1.156812  | 0.919919  |
| 6  | 4.377559  | 1.791183  | 0.672359  |
| 6  | 5.731706  | 1.993991  | 0.892578  |
| 1  | 6.075899  | 2.977987  | 1.187434  |
| 1  | 6.984132  | -1.118729 | 0.230407  |
| 1  | 3.670590  | 2.601451  | 0.785562  |
| 16 | 1.573468  | -2.233430 | -0.740277 |
| 7  | 2.757536  | -0.067646 | -0.011915 |
| 7  | 4.280622  | -1.720322 | -0.267500 |
| 6  | 1.051336  | 1.680559  | 0.357663  |
| 1  | 1.407994  | 2.419637  | -0.364851 |
| 1  | -0.023173 | 1.787906  | 0.471328  |
| 1  | 1.513774  | 1.895417  | 1.323665  |
| 6  | -3.898704 | -0.168111 | 0.137479  |
| 6  | -5.006644 | 0.688726  | 0.271168  |
| 6  | -6.177639 | 0.287406  | 0.885038  |
| 6  | -6.231865 | -1.016063 | 1.377006  |
| 6  | -5.150261 | -1.883295 | 1.250173  |
| 6  | -3.977980 | -1.467800 | 0.624116  |
| 6  | -2.852288 | 0.598616  | -0.536704 |
| 6  | -3.450733 | 1.969958  | -0.808092 |
| 1  | -7.021092 | 0.959867  | 0.979948  |
| 1  | -7.138776 | -1.358339 | 1.861999  |
| 1  | -5.223292 | -2.893643 | 1.633553  |
| 1  | -3.144133 | -2.144215 | 0.500046  |
| 7  | -4.716680 | 1.932000  | -0.295357 |
| 1  | -5.350123 | 2.714406  | -0.330591 |
| 8  | -2.915065 | 2.907890  | -1.355922 |

**AY 10a**

E(RwB97XD) = -1008.04671945 A.U.

|    |           |           |           |
|----|-----------|-----------|-----------|
| 6  | -1.639347 | -1.255089 | 0.049759  |
| 7  | -1.284521 | 0.178145  | 0.069875  |
| 6  | 0.055644  | 0.525154  | 0.034530  |
| 6  | 1.224861  | -0.320086 | 0.030763  |
| 6  | 2.328986  | 0.569882  | -0.050856 |
| 6  | 3.641941  | 0.131096  | -0.072689 |
| 6  | 3.881148  | -1.239160 | -0.007094 |
| 6  | 2.817762  | -2.134291 | 0.085360  |
| 6  | 1.498090  | -1.690351 | 0.108279  |
| 6  | 0.466292  | 1.898328  | -0.029016 |
| 1  | 4.458520  | 0.841420  | -0.137094 |
| 1  | 0.708609  | -2.424739 | 0.194878  |
| 6  | -2.288684 | 1.000936  | 0.144798  |
| 1  | -1.343843 | -1.691667 | 1.003192  |
| 7  | 1.850995  | 1.865206  | -0.090873 |
| 1  | -2.074896 | 2.060240  | 0.190010  |
| 8  | -0.208140 | 2.937720  | -0.039591 |
| 1  | 2.413490  | 2.697951  | -0.137905 |
| 1  | 4.900439  | -1.607159 | -0.023342 |
| 6  | -3.648342 | 0.413203  | 0.197650  |
| 1  | -4.082004 | 0.534841  | 1.194262  |
| 1  | 3.015400  | -3.198649 | 0.144200  |
| 16 | -3.431178 | -1.347647 | -0.226008 |
| 1  | -4.312787 | 0.885291  | -0.526894 |
| 1  | -1.114388 | -1.738131 | -0.770363 |

**MC-CC-mn**

E(RwB97XD) = -2490.85614322 A.U.

|   |           |           |           |
|---|-----------|-----------|-----------|
| 6 | 1.112899  | -0.774263 | -0.817767 |
| 1 | 0.605227  | 0.044690  | -1.310317 |
| 6 | 0.281625  | -1.716892 | -0.051154 |
| 8 | 0.746979  | -2.568334 | 0.693681  |
| 6 | -4.536073 | -0.455272 | -0.992101 |
| 6 | -5.430632 | -0.937610 | -0.014156 |
| 6 | -3.547305 | -1.724410 | 0.529735  |
| 6 | -1.178449 | -1.578983 | -0.143937 |
| 6 | -1.987339 | -0.913397 | -1.016642 |
| 6 | -6.773792 | -0.565665 | -0.063473 |
| 6 | -7.180235 | 0.283394  | -1.079784 |
| 1 | -8.218609 | 0.588704  | -1.136049 |

|    |           |           |           |
|----|-----------|-----------|-----------|
| 6  | -4.934610 | 0.406298  | -2.007542 |
| 6  | -6.273840 | 0.764327  | -2.035816 |
| 1  | -6.623851 | 1.435284  | -2.811119 |
| 1  | -7.468068 | -0.930456 | 0.683759  |
| 1  | -4.241698 | 0.799773  | -2.738043 |
| 16 | -2.079313 | -2.407484 | 1.141480  |
| 7  | -3.307209 | -0.994383 | -0.619043 |
| 7  | -4.783088 | -1.734455 | 0.925890  |
| 6  | -1.682161 | -0.227072 | -2.304960 |
| 1  | -1.730167 | 0.857952  | -2.182237 |
| 1  | -0.705177 | -0.502313 | -2.690002 |
| 1  | -2.423208 | -0.524991 | -3.049070 |
| 6  | 3.574074  | -1.637821 | -0.608279 |
| 6  | 4.706435  | -1.142834 | -1.282043 |
| 6  | 5.964367  | -1.686813 | -1.112916 |
| 6  | 6.085908  | -2.763604 | -0.234875 |
| 6  | 4.982232  | -3.264322 | 0.449146  |
| 6  | 3.719165  | -2.704596 | 0.271438  |
| 6  | 2.442713  | -0.806873 | -1.017129 |
| 6  | 3.011259  | 0.228300  | -1.965298 |
| 1  | 6.823436  | -1.289931 | -1.639696 |
| 1  | 7.061031  | -3.211219 | -0.081609 |
| 1  | 5.106013  | -4.096488 | 1.131513  |
| 1  | 2.855741  | -3.074881 | 0.804548  |
| 7  | 4.342671  | -0.052384 | -2.078730 |
| 1  | 4.967731  | 0.468009  | -2.673718 |
| 8  | 2.410397  | 1.124003  | -2.526638 |
| 6  | 2.050688  | 3.017686  | 0.003617  |
| 7  | 2.014468  | 1.807557  | 0.847437  |
| 6  | 0.797518  | 1.320068  | 1.269606  |
| 6  | 3.172205  | 1.261648  | 1.097795  |
| 6  | -0.533177 | 1.765439  | 0.933685  |
| 6  | -1.395116 | 1.088533  | 1.832436  |
| 6  | -2.771883 | 1.223363  | 1.786903  |
| 6  | -3.317955 | 2.053533  | 0.811448  |
| 6  | -2.493618 | 2.721380  | -0.090972 |
| 6  | -1.108133 | 2.583483  | -0.041230 |
| 6  | 0.716125  | 0.385355  | 2.367059  |
| 1  | -3.405241 | 0.681614  | 2.479859  |
| 1  | -0.502478 | 3.102638  | -0.772860 |
| 1  | 1.715269  | 2.738823  | -0.994967 |
| 7  | -0.630760 | 0.305980  | 2.677183  |
| 1  | 3.193879  | 0.347576  | 1.673848  |
| 8  | 1.610962  | -0.223109 | 2.959142  |
| 1  | -0.991993 | -0.336306 | 3.362319  |
| 1  | -4.393991 | 2.163633  | 0.744754  |

|    |           |          |           |
|----|-----------|----------|-----------|
| 6  | 4.382647  | 2.000287 | 0.669848  |
| 1  | 4.951089  | 1.430895 | -0.070081 |
| 1  | -2.934523 | 3.353510 | -0.853227 |
| 16 | 3.778335  | 3.581054 | -0.014939 |
| 1  | 5.035020  | 2.195889 | 1.522537  |
| 1  | 1.407670  | 3.777797 | 0.440722  |

**TS-CC-on**

E(RwB97XD) = -2490.84443084 A.U.

Imaginary frequency = -347.7547 cm<sup>-1</sup>

|    |           |           |           |
|----|-----------|-----------|-----------|
| 6  | 0.097988  | 0.321688  | 0.106968  |
| 1  | -0.357831 | -0.589254 | 0.475675  |
| 6  | -0.834054 | 1.339815  | -0.411010 |
| 8  | -0.481681 | 2.333325  | -1.028780 |
| 6  | -5.521793 | -0.222643 | 0.772748  |
| 6  | -6.517344 | 0.342399  | -0.052573 |
| 6  | -4.701005 | 1.179066  | -0.733912 |
| 6  | -2.278333 | 1.077448  | -0.266552 |
| 6  | -2.984111 | 0.295539  | 0.596781  |
| 6  | -7.852645 | -0.015307 | 0.132876  |
| 6  | -8.152461 | -0.928142 | 1.130530  |
| 1  | -9.183183 | -1.221299 | 1.292448  |
| 6  | -5.814809 | -1.148056 | 1.768739  |
| 6  | -7.148952 | -1.487875 | 1.934561  |
| 1  | -7.418604 | -2.204677 | 2.700831  |
| 1  | -8.623749 | 0.414012  | -0.495148 |
| 1  | -5.048838 | -1.594962 | 2.387296  |
| 16 | -3.310397 | 1.958875  | -1.411387 |
| 7  | -4.336735 | 0.345442  | 0.308008  |
| 7  | -5.972823 | 1.217529  | -0.987950 |
| 6  | -2.540574 | -0.493488 | 1.781743  |
| 1  | -2.605730 | -1.566208 | 1.580009  |
| 1  | -1.522789 | -0.250901 | 2.071939  |
| 1  | -3.192131 | -0.263318 | 2.627311  |
| 6  | 2.220797  | 1.735927  | 0.769430  |
| 6  | 3.237080  | 1.397808  | 1.687774  |
| 6  | 4.296932  | 2.240623  | 1.962346  |
| 6  | 4.339725  | 3.462504  | 1.291962  |
| 6  | 3.347429  | 3.817432  | 0.381390  |
| 6  | 2.284006  | 2.959181  | 0.109811  |
| 6  | 1.336176  | 0.583122  | 0.679011  |
| 6  | 1.872590  | -0.427722 | 1.636133  |
| 1  | 5.070548  | 1.955586  | 2.665085  |
| 1  | 5.161644  | 4.142915  | 1.483718  |

|    |           |           |           |
|----|-----------|-----------|-----------|
| 1  | 3.406170  | 4.771497  | -0.129396 |
| 1  | 1.522919  | 3.215954  | -0.611915 |
| 7  | 2.986406  | 0.129998  | 2.204818  |
| 1  | 3.607798  | -0.385706 | 2.806587  |
| 8  | 1.420737  | -1.535085 | 1.892770  |
| 6  | 1.155674  | -2.781691 | -1.066413 |
| 7  | 1.500680  | -1.397897 | -1.441129 |
| 6  | 2.706958  | -0.874778 | -1.115875 |
| 6  | 0.472495  | -0.626531 | -1.826966 |
| 6  | 3.823506  | -1.476787 | -0.413304 |
| 6  | 4.865694  | -0.524629 | -0.468080 |
| 6  | 6.062209  | -0.693182 | 0.203411  |
| 6  | 6.232714  | -1.859633 | 0.943667  |
| 6  | 5.229268  | -2.824363 | 0.996272  |
| 6  | 4.024102  | -2.643456 | 0.325156  |
| 6  | 3.185564  | 0.391394  | -1.713379 |
| 1  | 6.837021  | 0.062109  | 0.153109  |
| 1  | 3.268527  | -3.412115 | 0.392211  |
| 1  | 1.352546  | -2.922907 | -0.007528 |
| 7  | 4.471817  | 0.541174  | -1.261399 |
| 1  | 0.723291  | 0.319180  | -2.287719 |
| 8  | 2.609469  | 1.170228  | -2.459087 |
| 1  | 4.997004  | 1.388051  | -1.405723 |
| 1  | 7.161193  | -2.019111 | 1.479287  |
| 6  | -0.731779 | -1.394950 | -2.257479 |
| 1  | -1.658466 | -0.884705 | -1.996640 |
| 1  | 5.385005  | -3.730985 | 1.568487  |
| 16 | -0.634619 | -2.966404 | -1.341376 |
| 1  | -0.715162 | -1.562125 | -3.336892 |
| 1  | 1.741165  | -3.466335 | -1.679064 |

**TS-CC-ox**

E(RwB97XD) = -2490.83862303 A.U.

Imaginary frequency = -355.8283 cm<sup>-1</sup>

|   |           |           |           |
|---|-----------|-----------|-----------|
| 6 | -0.025167 | -0.211074 | -0.296362 |
| 1 | -0.554823 | -0.668915 | -1.122458 |
| 6 | -0.859615 | 0.541577  | 0.658975  |
| 8 | -0.404872 | 1.335327  | 1.472272  |
| 6 | -5.689944 | -0.813688 | -0.120770 |
| 6 | -6.615734 | 0.131743  | 0.369601  |
| 6 | -4.716892 | 0.929431  | 0.840635  |
| 6 | -2.321256 | 0.395516  | 0.570931  |
| 6 | -3.110316 | -0.590182 | 0.060709  |
| 6 | -7.982832 | -0.094127 | 0.210611  |

|    |           |           |           |
|----|-----------|-----------|-----------|
| 6  | -8.383370 | -1.252037 | -0.435432 |
| 1  | -9.440583 | -1.448328 | -0.570738 |
| 6  | -6.085081 | -1.973695 | -0.778372 |
| 6  | -7.449096 | -2.176731 | -0.924135 |
| 1  | -7.797632 | -3.069157 | -1.429893 |
| 1  | -8.700887 | 0.625513  | 0.584570  |
| 1  | -5.374258 | -2.689282 | -1.167934 |
| 16 | -3.248137 | 1.717534  | 1.312195  |
| 7  | -4.448350 | -0.268169 | 0.202161  |
| 7  | -5.976330 | 1.214061  | 0.967381  |
| 6  | -2.757021 | -1.916953 | -0.519563 |
| 1  | -2.977733 | -1.940744 | -1.590246 |
| 1  | -1.709359 | -2.160124 | -0.371474 |
| 1  | -3.354220 | -2.689870 | -0.030829 |
| 6  | 1.946846  | -0.949011 | 1.281037  |
| 6  | 2.836250  | -2.033562 | 1.126956  |
| 6  | 3.781017  | -2.362031 | 2.080241  |
| 6  | 3.832945  | -1.586767 | 3.236330  |
| 6  | 2.966740  | -0.512968 | 3.414886  |
| 6  | 2.030600  | -0.179548 | 2.438153  |
| 6  | 1.124083  | -0.905796 | 0.077245  |
| 6  | 1.513776  | -2.094470 | -0.734019 |
| 1  | 4.456903  | -3.195401 | 1.930914  |
| 1  | 4.563573  | -1.823193 | 4.001422  |
| 1  | 3.026553  | 0.081895  | 4.318780  |
| 1  | 1.367790  | 0.662901  | 2.577148  |
| 7  | 2.579026  | -2.669509 | -0.081964 |
| 1  | 3.023013  | -3.515329 | -0.399257 |
| 8  | 0.985365  | -2.517483 | -1.748639 |
| 6  | 1.999825  | 2.688793  | -0.105898 |
| 7  | 1.857116  | 1.606165  | -1.087474 |
| 6  | 2.807316  | 0.652193  | -1.225128 |
| 6  | 0.608918  | 1.434455  | -1.560367 |
| 6  | 4.060599  | 0.509802  | -0.520692 |
| 6  | 4.806967  | -0.446271 | -1.241204 |
| 6  | 6.028923  | -0.915359 | -0.796485 |
| 6  | 6.520115  | -0.407310 | 0.403675  |
| 6  | 5.800966  | 0.536662  | 1.132044  |
| 6  | 4.568125  | 0.994543  | 0.683707  |
| 6  | 2.897376  | -0.158911 | -2.465730 |
| 1  | 6.581310  | -1.655172 | -1.362963 |
| 1  | 4.017657  | 1.704898  | 1.283979  |
| 1  | 2.982470  | 3.143414  | -0.208095 |
| 7  | 4.108890  | -0.803815 | -2.386417 |
| 1  | 0.522126  | 0.788018  | -2.421203 |
| 8  | 2.113435  | -0.237657 | -3.396804 |



|    |           |           |           |
|----|-----------|-----------|-----------|
| 1  | 4.417278  | -1.466817 | -3.078034 |
| 1  | 7.476360  | -0.757148 | 0.774975  |
| 6  | -0.253501 | 2.658759  | -1.470333 |
| 1  | -0.451796 | 3.052549  | -2.467547 |
| 1  | 6.197007  | 0.908768  | 2.068939  |
| 16 | 0.711186  | 3.895548  | -0.530096 |
| 1  | -1.210302 | 2.461180  | -0.987265 |
| 1  | 1.847493  | 2.290511  | 0.895712  |

**TS-CC-mn**

E(RwB97XD) = -2490.84530809 A.U.

Imaginary frequency = -311.0520 cm<sup>-1</sup>

|    |           |           |           |
|----|-----------|-----------|-----------|
| 6  | 1.111975  | -0.422944 | -0.495472 |
| 1  | 0.577044  | 0.293411  | -1.103742 |
| 6  | 0.316028  | -1.548046 | 0.009041  |
| 8  | 0.778344  | -2.486126 | 0.644584  |
| 6  | -4.497110 | -0.375608 | -1.079964 |
| 6  | -5.418380 | -0.935244 | -0.169274 |
| 6  | -3.540382 | -1.720687 | 0.394059  |
| 6  | -1.149444 | -1.477140 | -0.172227 |
| 6  | -1.938004 | -0.781909 | -1.035095 |
| 6  | -6.766762 | -0.587093 | -0.251481 |
| 6  | -7.151313 | 0.313878  | -1.230800 |
| 1  | -8.193304 | 0.600939  | -1.311334 |
| 6  | -4.874424 | 0.536891  | -2.058835 |
| 6  | -6.219138 | 0.869590  | -2.119571 |
| 1  | -6.554037 | 1.577295  | -2.868439 |
| 1  | -7.482282 | -1.011111 | 0.442600  |
| 1  | -4.162328 | 0.979916  | -2.741317 |
| 16 | -2.080820 | -2.415678 | 1.013412  |
| 7  | -3.273520 | -0.914623 | -0.694647 |
| 7  | -4.790612 | -1.778127 | 0.742309  |
| 6  | -1.598844 | -0.034874 | -2.280976 |
| 1  | -1.732811 | 1.040563  | -2.144339 |
| 1  | -0.579425 | -0.227727 | -2.602651 |
| 1  | -2.266481 | -0.364379 | -3.080391 |
| 6  | 3.560890  | -1.408441 | -0.506000 |
| 6  | 4.574901  | -1.145422 | -1.443171 |
| 6  | 5.765073  | -1.849492 | -1.465683 |
| 6  | 5.943817  | -2.845174 | -0.506243 |
| 6  | 4.961405  | -3.106677 | 0.444556  |
| 6  | 3.767409  | -2.386705 | 0.457216  |
| 6  | 2.491122  | -0.426122 | -0.743968 |
| 6  | 2.935211  | 0.378032  | -1.923335 |

|    |           |           |           |
|----|-----------|-----------|-----------|
| 1  | 6.530813  | -1.631974 | -2.200528 |
| 1  | 6.865387  | -3.415841 | -0.500134 |
| 1  | 5.126374  | -3.878199 | 1.187643  |
| 1  | 3.000092  | -2.579772 | 1.193222  |
| 7  | 4.176452  | -0.090497 | -2.266986 |
| 1  | 4.703543  | 0.273908  | -3.044277 |
| 8  | 2.328914  | 1.269115  | -2.500037 |
| 6  | 1.942980  | 3.002130  | 0.119273  |
| 7  | 1.991045  | 1.740493  | 0.871998  |
| 6  | 0.846956  | 1.060648  | 1.190421  |
| 6  | 3.159990  | 1.096407  | 0.819905  |
| 6  | -0.521683 | 1.569712  | 1.086661  |
| 6  | -1.276204 | 0.876654  | 2.049206  |
| 6  | -2.650342 | 1.002636  | 2.143910  |
| 6  | -3.285107 | 1.856430  | 1.245509  |
| 6  | -2.558588 | 2.555309  | 0.285718  |
| 6  | -1.176189 | 2.411476  | 0.193957  |
| 6  | 0.868117  | 0.136422  | 2.367167  |
| 1  | -3.213772 | 0.441607  | 2.879137  |
| 1  | -0.638026 | 2.939357  | -0.582518 |
| 1  | 1.565953  | 2.804056  | -0.883891 |
| 7  | -0.432294 | 0.059340  | 2.792595  |
| 1  | 3.280849  | 0.241095  | 1.467224  |
| 8  | 1.817201  | -0.433545 | 2.873410  |
| 1  | -0.723340 | -0.555014 | 3.535852  |
| 1  | -4.362529 | 1.964590  | 1.287494  |
| 6  | 4.333361  | 1.936529  | 0.443937  |
| 1  | 4.872419  | 1.512967  | -0.405682 |
| 1  | -3.073671 | 3.206441  | -0.409948 |
| 16 | 3.660633  | 3.592541  | 0.054406  |
| 1  | 5.025779  | 2.019316  | 1.282196  |
| 1  | 1.319636  | 3.720093  | 0.647543  |

**TS-CC-mx**

E(RwB97XD) = -2490.84077694 A.U.

Imaginary frequency = -336.6023 cm<sup>-1</sup>

|   |           |           |           |
|---|-----------|-----------|-----------|
| 6 | 1.006587  | -0.985953 | 0.063196  |
| 1 | 0.468370  | -1.583867 | -0.656935 |
| 6 | 0.239853  | -0.405815 | 1.151001  |
| 8 | 0.724875  | 0.267401  | 2.057978  |
| 6 | -4.683355 | -1.116828 | 0.103019  |
| 6 | -5.523649 | -0.272668 | 0.861802  |
| 6 | -3.571803 | 0.108204  | 1.575895  |
| 6 | -1.233704 | -0.537524 | 1.124544  |

|    |           |           |           |
|----|-----------|-----------|-----------|
| 6  | -2.101680 | -1.251453 | 0.356407  |
| 6  | -6.897696 | -0.269642 | 0.619671  |
| 6  | -7.390244 | -1.099953 | -0.373550 |
| 1  | -8.454416 | -1.112693 | -0.578639 |
| 6  | -5.170628 | -1.942835 | -0.904713 |
| 6  | -6.539453 | -1.921891 | -1.126750 |
| 1  | -6.957076 | -2.552618 | -1.902369 |
| 1  | -7.550293 | 0.373641  | 1.197506  |
| 1  | -4.524378 | -2.571620 | -1.501509 |
| 16 | -2.048662 | 0.562034  | 2.252503  |
| 7  | -3.407783 | -0.854032 | 0.598240  |
| 7  | -4.800664 | 0.482600  | 1.777627  |
| 6  | -1.876206 | -2.381173 | -0.592494 |
| 1  | -1.948575 | -2.052171 | -1.632057 |
| 1  | -0.909895 | -2.851217 | -0.436373 |
| 1  | -2.637424 | -3.144423 | -0.422191 |
| 6  | 3.467427  | -0.920967 | 0.995460  |
| 6  | 4.489516  | -1.853768 | 0.749254  |
| 6  | 5.679982  | -1.862528 | 1.454829  |
| 6  | 5.850585  | -0.898914 | 2.445657  |
| 6  | 4.852480  | 0.033249  | 2.711623  |
| 6  | 3.659568  | 0.028082  | 1.991971  |
| 6  | 2.394592  | -1.185124 | 0.010852  |
| 6  | 2.849477  | -2.409313 | -0.748506 |
| 1  | 6.449628  | -2.594303 | 1.241748  |
| 1  | 6.772467  | -0.880587 | 3.015353  |
| 1  | 5.000447  | 0.772368  | 3.489983  |
| 1  | 2.873505  | 0.731788  | 2.221683  |
| 7  | 4.103326  | -2.705196 | -0.284988 |
| 1  | 4.639833  | -3.487422 | -0.624421 |
| 8  | 2.248408  | -3.019306 | -1.611492 |
| 6  | 2.807523  | 2.237924  | -0.597044 |
| 7  | 2.121192  | 1.156004  | -1.312386 |
| 6  | 0.769307  | 1.020479  | -1.248381 |
| 6  | 2.901917  | 0.112802  | -1.656261 |
| 6  | -0.178807 | 1.978253  | -0.685477 |
| 6  | -1.423963 | 1.700945  | -1.281012 |
| 6  | -2.580172 | 2.372455  | -0.933943 |
| 6  | -2.479917 | 3.375027  | 0.028239  |
| 6  | -1.262302 | 3.666705  | 0.633453  |
| 6  | -0.110219 | 2.959894  | 0.299305  |
| 6  | 0.035512  | 0.275111  | -2.319160 |
| 1  | -3.527929 | 2.129343  | -1.398840 |
| 1  | 0.813039  | 3.183983  | 0.814025  |
| 1  | 2.689293  | 2.100412  | 0.477061  |
| 7  | -1.270660 | 0.680964  | -2.213647 |

|    |           |           |           |
|----|-----------|-----------|-----------|
| 1  | 2.468434  | -0.588860 | -2.356604 |
| 8  | 0.462979  | -0.515790 | -3.140361 |
| 1  | -1.983684 | 0.370188  | -2.854002 |
| 1  | -3.368964 | 3.923711  | 0.315559  |
| 6  | 4.360939  | 0.428263  | -1.730496 |
| 1  | 4.956651  | -0.273433 | -1.145389 |
| 1  | -1.209316 | 4.438769  | 1.391101  |
| 16 | 4.553911  | 2.125992  | -1.080975 |
| 1  | 4.703393  | 0.397574  | -2.764973 |
| 1  | 2.396116  | 3.195940  | -0.907412 |

**TS-CO-on**

$E(\text{RwB97XD}) = -2490.83341750 \text{ A.U.}$

Imaginary frequency =  $-388.8288 \text{ cm}^{-1}$

|    |           |           |           |
|----|-----------|-----------|-----------|
| 6  | -1.378551 | -0.934807 | -1.030165 |
| 1  | -0.814460 | -1.858084 | -1.028377 |
| 6  | -0.651779 | 0.281987  | -0.800645 |
| 8  | -1.273683 | 1.408922  | -0.635644 |
| 6  | 4.380132  | -0.222784 | -1.244760 |
| 6  | 5.048948  | 1.015982  | -1.357551 |
| 6  | 2.997013  | 1.500229  | -1.256104 |
| 6  | 0.790204  | 0.398777  | -0.978441 |
| 6  | 1.810174  | -0.506984 | -0.999988 |
| 6  | 6.441069  | 1.045245  | -1.443899 |
| 6  | 7.124079  | -0.159090 | -1.414686 |
| 1  | 8.205957  | -0.160550 | -1.479036 |
| 6  | 5.061225  | -1.436240 | -1.222544 |
| 6  | 6.444020  | -1.381257 | -1.306590 |
| 1  | 7.009441  | -2.305344 | -1.290903 |
| 1  | 6.961254  | 1.991495  | -1.530789 |
| 1  | 4.550267  | -2.386034 | -1.148659 |
| 16 | 1.365904  | 2.076753  | -1.149061 |
| 7  | 3.033818  | 0.125802  | -1.186119 |
| 7  | 4.154473  | 2.080944  | -1.361507 |
| 6  | 1.815212  | -1.987352 | -0.862941 |
| 1  | 2.554299  | -2.277043 | -0.112221 |
| 1  | 0.859150  | -2.375964 | -0.532637 |
| 1  | 2.081389  | -2.458808 | -1.813073 |
| 6  | -3.898321 | -0.278423 | -1.327047 |
| 6  | -5.012393 | -1.140010 | -1.296957 |
| 6  | -6.307721 | -0.681133 | -1.452056 |
| 6  | -6.490935 | 0.684142  | -1.664944 |
| 6  | -5.403556 | 1.550310  | -1.736889 |
| 6  | -4.104287 | 1.074748  | -1.576212 |

|    |           |           |           |
|----|-----------|-----------|-----------|
| 6  | -2.713816 | -1.117185 | -1.147632 |
| 6  | -3.214524 | -2.531285 | -1.063847 |
| 1  | -7.149532 | -1.362097 | -1.417500 |
| 1  | -7.496067 | 1.070738  | -1.788048 |
| 1  | -5.566536 | 2.605104  | -1.923347 |
| 1  | -3.259887 | 1.745733  | -1.645860 |
| 7  | -4.582179 | -2.452919 | -1.124683 |
| 1  | -5.182722 | -3.260114 | -1.085984 |
| 8  | -2.561747 | -3.551192 | -0.943686 |
| 6  | -0.135823 | 2.301173  | 2.172053  |
| 7  | -1.036639 | 1.214146  | 1.790915  |
| 6  | -0.617304 | -0.101810 | 1.790885  |
| 6  | -2.030625 | 1.571826  | 0.950562  |
| 6  | 0.679427  | -0.634991 | 2.098384  |
| 6  | 0.501304  | -2.029089 | 2.278150  |
| 6  | 1.561162  | -2.882830 | 2.516604  |
| 6  | 2.843434  | -2.336368 | 2.554101  |
| 6  | 3.049543  | -0.973096 | 2.349349  |
| 6  | 1.978163  | -0.117970 | 2.112596  |
| 6  | -1.590060 | -1.197878 | 1.892032  |
| 1  | 1.399724  | -3.945446 | 2.651406  |
| 1  | 2.169444  | 0.934681  | 1.950442  |
| 1  | 0.696197  | 2.371588  | 1.472016  |
| 7  | -0.840432 | -2.331765 | 2.133746  |
| 1  | -2.811135 | 0.834638  | 0.816727  |
| 8  | -2.809129 | -1.168545 | 1.776762  |
| 1  | -1.247965 | -3.249356 | 2.205266  |
| 1  | 3.691695  | -2.985620 | 2.736515  |
| 6  | -2.406790 | 3.016152  | 1.034082  |
| 1  | -2.422181 | 3.454587  | 0.037466  |
| 1  | 4.055871  | -0.572407 | 2.364421  |
| 16 | -1.146018 | 3.811737  | 2.095933  |
| 1  | -3.388680 | 3.126753  | 1.491833  |
| 1  | 0.227721  | 2.138848  | 3.185066  |

**TS-CO-ox**

E(RwB97XD) = -2490.83120591 A.U.

Imaginary frequency = -397.5229 cm<sup>-1</sup>

|   |           |           |           |
|---|-----------|-----------|-----------|
| 6 | 0.712817  | 0.506460  | -1.253685 |
| 1 | 0.128359  | 1.402786  | -1.427985 |
| 6 | -0.005277 | -0.616576 | -0.736982 |
| 8 | 0.561435  | -1.757903 | -0.514780 |
| 6 | -4.988536 | 0.341118  | -0.572940 |
| 6 | -5.780574 | -0.825832 | -0.648208 |

|    |           |           |           |
|----|-----------|-----------|-----------|
| 6  | -3.783754 | -1.505230 | -0.730572 |
| 6  | -1.468566 | -0.617354 | -0.694071 |
| 6  | -2.391781 | 0.375506  | -0.579774 |
| 6  | -7.171598 | -0.718624 | -0.624027 |
| 6  | -7.729214 | 0.545492  | -0.530163 |
| 1  | -8.807548 | 0.652382  | -0.510092 |
| 6  | -5.543524 | 1.614313  | -0.487379 |
| 6  | -6.927363 | 1.694826  | -0.464761 |
| 1  | -7.397369 | 2.668735  | -0.398082 |
| 1  | -7.787144 | -1.608286 | -0.680308 |
| 1  | -4.937002 | 2.508434  | -0.446068 |
| 16 | -2.213949 | -2.230147 | -0.815362 |
| 7  | -3.681289 | -0.134564 | -0.627228 |
| 7  | -4.997309 | -1.970224 | -0.746609 |
| 6  | -2.219230 | 1.844746  | -0.408217 |
| 1  | -2.845652 | 2.193483  | 0.415126  |
| 1  | -1.193176 | 2.108823  | -0.173130 |
| 1  | -2.521545 | 2.374646  | -1.316131 |
| 6  | 3.210230  | -0.179335 | -1.621899 |
| 6  | 4.293880  | 0.663644  | -1.948508 |
| 6  | 5.583464  | 0.186493  | -2.088954 |
| 6  | 5.790861  | -1.182662 | -1.920907 |
| 6  | 4.733261  | -2.039556 | -1.632747 |
| 6  | 3.438668  | -1.545457 | -1.484802 |
| 6  | 2.025166  | 0.664805  | -1.555519 |
| 6  | 2.475662  | 2.047942  | -1.929493 |
| 1  | 6.402691  | 0.852744  | -2.330955 |
| 1  | 6.792906  | -1.582172 | -2.026738 |
| 1  | 4.914626  | -3.101582 | -1.519184 |
| 1  | 2.613319  | -2.207583 | -1.263955 |
| 7  | 3.836414  | 1.967265  | -2.104805 |
| 1  | 4.404755  | 2.755166  | -2.368781 |
| 8  | 1.800015  | 3.051483  | -2.053392 |
| 6  | 2.765281  | -1.444513 | 1.773750  |
| 7  | 1.328428  | -1.182174 | 1.729240  |
| 6  | 0.828423  | 0.100234  | 1.760415  |
| 6  | 0.581248  | -2.180254 | 1.219788  |
| 6  | 1.557053  | 1.332236  | 1.712448  |
| 6  | 0.633778  | 2.349239  | 2.059429  |
| 6  | 0.958850  | 3.688526  | 2.003031  |
| 6  | 2.251012  | 4.030538  | 1.596660  |
| 6  | 3.176555  | 3.051630  | 1.253706  |
| 6  | 2.837746  | 1.701041  | 1.292591  |
| 6  | -0.531335 | 0.387394  | 2.230638  |
| 1  | 0.232411  | 4.449887  | 2.260927  |
| 1  | 3.576977  | 0.963365  | 1.012020  |

|    |           |           |          |
|----|-----------|-----------|----------|
| 1  | 3.198373  | -0.960282 | 2.646828 |
| 7  | -0.576186 | 1.759237  | 2.387261 |
| 1  | -0.483594 | -2.103704 | 1.399332 |
| 8  | -1.464683 | -0.376903 | 2.445682 |
| 1  | -1.409607 | 2.247957  | 2.669218 |
| 1  | 2.530373  | 5.076245  | 1.545835 |
| 6  | 1.233719  | -3.524578 | 1.271355 |
| 1  | 0.696974  | -4.183149 | 1.952270 |
| 1  | 4.170148  | 3.338556  | 0.931288 |
| 16 | 2.926686  | -3.249374 | 1.905639 |
| 1  | 1.242774  | -3.968200 | 0.276448 |
| 1  | 3.248082  | -1.093378 | 0.861387 |

**TS-CO-mn**

$E(\text{RwB97XD}) = -2490.81610435 \text{ A.U.}$

Imaginary frequency =  $-360.8181 \text{ cm}^{-1}$

|    |           |           |           |
|----|-----------|-----------|-----------|
| 6  | -0.862090 | -1.929941 | 0.420976  |
| 1  | -0.258817 | -2.544098 | 1.080494  |
| 6  | -0.314175 | -0.593000 | 0.077524  |
| 8  | -1.028666 | 0.257084  | -0.543108 |
| 6  | 4.761230  | -0.915915 | -0.639507 |
| 6  | 5.270016  | 0.186242  | -1.364347 |
| 6  | 3.189348  | 0.515388  | -1.231928 |
| 6  | 1.151565  | -0.517683 | -0.266344 |
| 6  | 2.252175  | -1.269782 | -0.026998 |
| 6  | 6.639685  | 0.270638  | -1.621965 |
| 6  | 7.459615  | -0.740708 | -1.151337 |
| 1  | 8.525915  | -0.695117 | -1.340562 |
| 6  | 5.582912  | -1.933879 | -0.162616 |
| 6  | 6.938579  | -1.826890 | -0.431690 |
| 1  | 7.608681  | -2.600987 | -0.076910 |
| 1  | 7.037412  | 1.111903  | -2.176972 |
| 1  | 5.196330  | -2.776269 | 0.394073  |
| 16 | 1.507104  | 0.929814  | -1.237753 |
| 7  | 3.393665  | -0.671119 | -0.571652 |
| 7  | 4.261399  | 1.069047  | -1.724587 |
| 6  | 2.449327  | -2.574529 | 0.670463  |
| 1  | 3.115257  | -2.451639 | 1.529289  |
| 1  | 1.519736  | -3.010457 | 1.018447  |
| 1  | 2.911422  | -3.291315 | -0.013457 |
| 6  | -3.197870 | -2.115961 | -0.729819 |
| 6  | -4.094440 | -3.197876 | -0.662930 |
| 6  | -5.314459 | -3.191403 | -1.313484 |
| 6  | -5.644314 | -2.057859 | -2.055668 |

|    |           |           |           |
|----|-----------|-----------|-----------|
| 6  | -4.773553 | -0.975397 | -2.136136 |
| 6  | -3.546573 | -0.996747 | -1.474901 |
| 6  | -2.031536 | -2.483883 | 0.079927  |
| 6  | -2.323788 | -3.862037 | 0.624141  |
| 1  | -5.988872 | -4.036596 | -1.247409 |
| 1  | -6.595248 | -2.024383 | -2.575226 |
| 1  | -5.050990 | -0.104104 | -2.717922 |
| 1  | -2.864469 | -0.160385 | -1.520948 |
| 7  | -3.554413 | -4.208222 | 0.134809  |
| 1  | -4.003744 | -5.085169 | 0.342565  |
| 8  | -1.624424 | -4.543043 | 1.348862  |
| 6  | 0.777370  | 2.217480  | 1.939112  |
| 7  | -0.455376 | 1.435804  | 1.747853  |
| 6  | -1.469591 | 1.921342  | 1.050083  |
| 6  | -0.364723 | 0.092259  | 2.027798  |
| 6  | -1.593474 | 3.179165  | 0.334767  |
| 6  | -2.907005 | 3.201269  | -0.176078 |
| 6  | -3.369050 | 4.226394  | -0.979721 |
| 6  | -2.491555 | 5.267224  | -1.270449 |
| 6  | -1.192706 | 5.274757  | -0.768688 |
| 6  | -0.733980 | 4.234629  | 0.031999  |
| 6  | -2.829613 | 1.274332  | 1.050634  |
| 1  | -4.380964 | 4.218733  | -1.364885 |
| 1  | 0.276826  | 4.276016  | 0.410599  |
| 1  | 1.158864  | 2.540570  | 0.973832  |
| 7  | -3.600379 | 2.078583  | 0.256119  |
| 1  | -1.314910 | -0.369080 | 2.259697  |
| 8  | -3.215625 | 0.297098  | 1.657156  |
| 1  | -4.569395 | 1.881367  | 0.065605  |
| 1  | -2.829972 | 6.086065  | -1.894269 |
| 6  | 0.794362  | -0.239416 | 2.914270  |
| 1  | 1.265640  | -1.177557 | 2.622875  |
| 1  | -0.529405 | 6.098352  | -1.001258 |
| 16 | 1.999523  | 1.114672  | 2.710229  |
| 1  | 0.483422  | -0.318066 | 3.957198  |
| 1  | 0.546582  | 3.073392  | 2.571905  |

**TS-CO-mx**

E(RwB97XD) = -2490.81994493 A.U.

Imaginary frequency = -359.7853 cm<sup>-1</sup>

|   |           |           |           |
|---|-----------|-----------|-----------|
| 6 | 0.217166  | 1.380738  | 0.067848  |
| 1 | -0.332895 | 2.020536  | 0.750708  |
| 6 | -0.291927 | 0.001894  | -0.139206 |
| 8 | 0.429977  | -0.841037 | -0.760610 |



|    |           |           |           |
|----|-----------|-----------|-----------|
| 6  | -5.392086 | 0.330318  | -0.511532 |
| 6  | -6.007289 | -0.918570 | -0.757123 |
| 6  | -3.937530 | -1.321951 | -0.665862 |
| 6  | -1.780558 | -0.159266 | -0.296140 |
| 6  | -2.821460 | 0.706669  | -0.275361 |
| 6  | -7.397256 | -0.994408 | -0.864058 |
| 6  | -8.131156 | 0.170707  | -0.719249 |
| 1  | -9.211539 | 0.134296  | -0.798637 |
| 6  | -6.126841 | 1.502515  | -0.355554 |
| 6  | -7.505042 | 1.400751  | -0.466386 |
| 1  | -8.110005 | 2.292445  | -0.352164 |
| 1  | -7.876772 | -1.947443 | -1.053040 |
| 1  | -5.658317 | 2.455434  | -0.151318 |
| 16 | -2.281469 | -1.830739 | -0.634720 |
| 7  | -4.034419 | 0.032430  | -0.461696 |
| 7  | -5.070303 | -1.939090 | -0.849303 |
| 6  | -2.877213 | 2.194903  | -0.163150 |
| 1  | -1.897338 | 2.649052  | -0.266298 |
| 1  | -3.506407 | 2.591412  | -0.963309 |
| 1  | -3.309161 | 2.504157  | 0.792767  |
| 6  | 2.472254  | 1.510757  | -1.254821 |
| 6  | 3.414557  | 2.554971  | -1.220108 |
| 6  | 4.607628  | 2.503510  | -1.916847 |
| 6  | 4.856329  | 1.368119  | -2.686248 |
| 6  | 3.933327  | 0.329531  | -2.749160 |
| 6  | 2.740843  | 0.390583  | -2.033805 |
| 6  | 1.358459  | 1.919528  | -0.390038 |
| 6  | 1.705932  | 3.307472  | 0.100288  |
| 1  | 5.319363  | 3.318949  | -1.868832 |
| 1  | 5.784519  | 1.298920  | -3.242165 |
| 1  | 4.150614  | -0.547160 | -3.347304 |
| 1  | 2.026552  | -0.418491 | -2.054632 |
| 7  | 2.944247  | 3.589307  | -0.407922 |
| 1  | 3.415074  | 4.466485  | -0.256007 |
| 8  | 1.039980  | 4.035748  | 0.809910  |
| 6  | 1.880163  | 0.334605  | 2.567318  |
| 7  | 1.213014  | -0.760836 | 1.850586  |
| 6  | 1.888382  | -1.580650 | 1.063448  |
| 6  | -0.161044 | -0.652142 | 1.759391  |
| 6  | 3.269728  | -1.516610 | 0.639606  |
| 6  | 3.468092  | -2.639752 | -0.187931 |
| 6  | 4.661794  | -2.864259 | -0.847968 |
| 6  | 5.686401  | -1.940768 | -0.663107 |
| 6  | 5.515572  | -0.824850 | 0.152364  |
| 6  | 4.309301  | -0.599518 | 0.800790  |
| 6  | 1.322984  | -2.884375 | 0.565703  |

|    |           |           |           |
|----|-----------|-----------|-----------|
| 1  | 4.792251  | -3.729700 | -1.485615 |
| 1  | 4.205180  | 0.279642  | 1.419533  |
| 1  | 2.309349  | 1.031443  | 1.849050  |
| 7  | 2.315834  | -3.414987 | -0.215217 |
| 1  | -0.653267 | -1.592434 | 1.550467  |
| 8  | 0.273979  | -3.424774 | 0.849115  |
| 1  | 2.230566  | -4.313625 | -0.661452 |
| 1  | 6.633277  | -2.094901 | -1.167151 |
| 6  | -0.758600 | 0.188464  | 2.844814  |
| 1  | -1.531950 | 0.849029  | 2.448077  |
| 1  | 6.325611  | -0.117114 | 0.274325  |
| 16 | 0.605652  | 1.173541  | 3.557441  |
| 1  | -1.202624 | -0.432178 | 3.623503  |
| 1  | 2.655422  | -0.084355 | 3.206008  |

**9a**

E(RwB97XD) = -2490.89736427 A.U.

|    |           |           |           |
|----|-----------|-----------|-----------|
| 6  | 0.827010  | 1.527094  | 0.292324  |
| 1  | 0.566293  | 1.947261  | -0.680700 |
| 6  | -0.324907 | 1.724681  | 1.259418  |
| 8  | -0.132171 | 2.138669  | 2.385474  |
| 6  | -4.629788 | 0.156055  | -0.939057 |
| 6  | -5.566464 | -0.349253 | -0.011932 |
| 6  | -3.926177 | 0.286756  | 1.156944  |
| 6  | -1.675966 | 1.269050  | 0.882589  |
| 6  | -2.310238 | 1.138067  | -0.314970 |
| 6  | -6.779274 | -0.865300 | -0.468371 |
| 6  | -7.018458 | -0.864492 | -1.832672 |
| 1  | -7.954130 | -1.260490 | -2.209837 |
| 6  | -4.860401 | 0.152678  | -2.310636 |
| 6  | -6.073210 | -0.364707 | -2.740171 |
| 1  | -6.291687 | -0.383497 | -3.801121 |
| 1  | -7.504639 | -1.254880 | 0.235488  |
| 1  | -4.136925 | 0.529433  | -3.020386 |
| 16 | -2.678809 | 0.761329  | 2.257420  |
| 7  | -3.560632 | 0.568423  | -0.145709 |
| 7  | -5.098179 | -0.253584 | 1.294957  |
| 6  | -1.935146 | 1.589132  | -1.684591 |
| 1  | -2.745233 | 2.205923  | -2.081056 |
| 1  | -1.031347 | 2.188200  | -1.689162 |
| 1  | -1.791350 | 0.738856  | -2.354476 |
| 6  | 0.489205  | -1.018382 | 0.936940  |
| 6  | -0.179609 | -1.926831 | 0.113998  |
| 6  | -0.908026 | -2.990823 | 0.610479  |

|    |           |           |           |
|----|-----------|-----------|-----------|
| 6  | -0.965869 | -3.137930 | 1.995209  |
| 6  | -0.323733 | -2.237037 | 2.835451  |
| 6  | 0.402887  | -1.168009 | 2.311713  |
| 6  | 1.169414  | 0.020809  | 0.062782  |
| 6  | 0.678232  | -0.393106 | -1.346150 |
| 1  | -1.420796 | -3.677161 | -0.052016 |
| 1  | -1.529823 | -3.961379 | 2.417432  |
| 1  | -0.394829 | -2.356279 | 3.909664  |
| 1  | 0.886420  | -0.463882 | 2.974121  |
| 7  | -0.023184 | -1.546954 | -1.221240 |
| 1  | -0.457803 | -2.002617 | -2.008590 |
| 8  | 0.847182  | 0.221628  | -2.380082 |
| 6  | 3.359625  | 1.955150  | -1.292396 |
| 7  | 3.202201  | 1.418541  | 0.061653  |
| 6  | 2.782693  | 0.021591  | 0.145254  |
| 6  | 2.148473  | 2.167325  | 0.759584  |
| 6  | 3.469853  | -0.980925 | -0.768267 |
| 6  | 4.071649  | -1.963869 | 0.021845  |
| 6  | 4.744429  | -3.046759 | -0.513159 |
| 6  | 4.825961  | -3.132941 | -1.900802 |
| 6  | 4.249381  | -2.161407 | -2.709382 |
| 6  | 3.565408  | -1.082960 | -2.148238 |
| 6  | 3.253067  | -0.479127 | 1.553466  |
| 1  | 5.197743  | -3.794219 | 0.126251  |
| 1  | 3.107026  | -0.349182 | -2.794901 |
| 1  | 2.575910  | 1.628069  | -1.979169 |
| 7  | 3.898029  | -1.659888 | 1.371938  |
| 1  | 2.251998  | 2.000081  | 1.828614  |
| 8  | 3.110105  | 0.084340  | 2.615616  |
| 1  | 4.335620  | -2.153301 | 2.134361  |
| 1  | 5.349897  | -3.968079 | -2.350857 |
| 6  | 2.301985  | 3.651100  | 0.446239  |
| 1  | 1.333532  | 4.136349  | 0.325771  |
| 1  | 4.326940  | -2.238924 | -3.786917 |
| 16 | 3.268387  | 3.765031  | -1.107604 |
| 1  | 2.855486  | 4.160317  | 1.232481  |
| 1  | 4.337858  | 1.691011  | -1.691950 |

**11a**

E(RwB97XD) = -2490.88333459 A.U.

|   |           |          |           |
|---|-----------|----------|-----------|
| 6 | -0.686184 | 1.313405 | 0.975877  |
| 1 | -0.191609 | 1.275315 | 1.944729  |
| 6 | 0.307736  | 1.806905 | -0.059346 |
| 8 | -0.047092 | 2.540322 | -0.966309 |

|    |           |           |           |
|----|-----------|-----------|-----------|
| 6  | 4.916988  | -0.269847 | 0.534330  |
| 6  | 5.773402  | 0.010690  | -0.551620 |
| 6  | 3.966702  | 1.005633  | -1.010805 |
| 6  | 1.708150  | 1.360314  | -0.066965 |
| 6  | 2.479275  | 0.591814  | 0.755237  |
| 6  | 7.066297  | -0.511003 | -0.565884 |
| 6  | 7.465822  | -1.298225 | 0.501615  |
| 1  | 8.466362  | -1.714490 | 0.512138  |
| 6  | 5.310561  | -1.063573 | 1.606463  |
| 6  | 6.600916  | -1.571175 | 1.570504  |
| 1  | 6.944284  | -2.193435 | 2.388147  |
| 1  | 7.729209  | -0.299703 | -1.396052 |
| 1  | 4.654138  | -1.287278 | 2.435557  |
| 16 | 2.566525  | 1.871553  | -1.540220 |
| 7  | 3.735004  | 0.398461  | 0.210617  |
| 7  | 5.150521  | 0.812610  | -1.503974 |
| 6  | 2.215317  | -0.026306 | 2.082607  |
| 1  | 2.992004  | 0.285982  | 2.784333  |
| 1  | 1.257827  | 0.253574  | 2.502658  |
| 1  | 2.250044  | -1.116068 | 1.998974  |
| 6  | -0.651724 | -0.811596 | -0.605191 |
| 6  | -0.269337 | -2.106627 | -0.249076 |
| 6  | 0.233615  | -3.018095 | -1.158265 |
| 6  | 0.371132  | -2.600887 | -2.479897 |
| 6  | 0.015736  | -1.312166 | -2.857938 |
| 6  | -0.501413 | -0.416111 | -1.923960 |
| 6  | -1.205356 | -0.118127 | 0.627742  |
| 6  | -0.840126 | -1.137384 | 1.737396  |
| 1  | 0.518392  | -4.016298 | -0.849457 |
| 1  | 0.766693  | -3.290209 | -3.216497 |
| 1  | 0.137152  | -0.996636 | -3.886844 |
| 1  | -0.767598 | 0.582059  | -2.244389 |
| 7  | -0.450504 | -2.288047 | 1.124409  |
| 1  | -0.126883 | -3.088293 | 1.645559  |
| 8  | -0.876852 | -0.946456 | 2.932525  |
| 6  | -3.136439 | 2.060433  | -0.934999 |
| 7  | -3.048990 | 1.505631  | 0.407079  |
| 6  | -2.830373 | 0.086667  | 0.575284  |
| 6  | -1.987166 | 2.168463  | 1.162366  |
| 6  | -3.522570 | -0.885414 | -0.356202 |
| 6  | -4.162972 | -1.857261 | 0.416519  |
| 6  | -4.816284 | -2.940872 | -0.141580 |
| 6  | -4.839847 | -3.034072 | -1.531144 |
| 6  | -4.231781 | -2.066419 | -2.321986 |
| 6  | -3.566101 | -0.990285 | -1.736835 |
| 6  | -3.477779 | -0.312346 | 1.951029  |

|    |           |           |           |
|----|-----------|-----------|-----------|
| 1  | -5.300856 | -3.682396 | 0.481633  |
| 1  | -3.093218 | -0.254192 | -2.370732 |
| 1  | -4.089352 | 1.804146  | -1.396094 |
| 7  | -4.051280 | -1.539492 | 1.772819  |
| 1  | -2.235031 | 2.059398  | 2.216574  |
| 8  | -3.516124 | 0.339590  | 2.964816  |
| 1  | -4.603087 | -1.970563 | 2.498397  |
| 1  | -5.347158 | -3.870264 | -1.998003 |
| 6  | -1.992706 | 3.660351  | 0.806698  |
| 1  | -2.435655 | 4.237659  | 1.615918  |
| 1  | -4.269778 | -2.146597 | -3.401345 |
| 16 | -3.069685 | 3.854382  | -0.666389 |
| 1  | -0.999162 | 4.044908  | 0.595588  |
| 1  | -2.309846 | 1.775318  | -1.591816 |

**12a**

E(RwB97XD) = -2490.89712032 A.U.

|    |           |           |           |
|----|-----------|-----------|-----------|
| 6  | 1.127592  | -0.060287 | -0.115834 |
| 1  | 0.630970  | 0.390406  | -0.972413 |
| 6  | 0.412303  | -1.346515 | 0.250634  |
| 8  | 0.933141  | -2.224159 | 0.907656  |
| 6  | -4.395156 | -0.515313 | -1.098846 |
| 6  | -5.320649 | -1.000797 | -0.150898 |
| 6  | -3.434041 | -1.651277 | 0.540956  |
| 6  | -1.039675 | -1.397026 | -0.001130 |
| 6  | -1.827161 | -0.815931 | -0.945442 |
| 6  | -6.678349 | -0.722439 | -0.307561 |
| 6  | -7.068486 | 0.035222  | -1.399557 |
| 1  | -8.118120 | 0.265056  | -1.540900 |
| 6  | -4.778790 | 0.251174  | -2.193699 |
| 6  | -6.133283 | 0.516095  | -2.327654 |
| 1  | -6.473672 | 1.109198  | -3.167926 |
| 1  | -7.397051 | -1.090969 | 0.414225  |
| 1  | -4.066199 | 0.630251  | -2.913125 |
| 16 | -1.970901 | -2.235047 | 1.258848  |
| 7  | -3.164177 | -0.961265 | -0.626023 |
| 7  | -4.688933 | -1.711964 | 0.865387  |
| 6  | -1.475331 | -0.172341 | -2.242133 |
| 1  | -1.764097 | 0.881031  | -2.245895 |
| 1  | -0.415944 | -0.250048 | -2.470107 |
| 1  | -2.023003 | -0.676184 | -3.042618 |
| 6  | 3.519086  | -1.274278 | -0.240253 |
| 6  | 4.131310  | -1.606506 | -1.447674 |
| 6  | 5.066367  | -2.621036 | -1.553985 |

|    |           |           |           |
|----|-----------|-----------|-----------|
| 6  | 5.393986  | -3.312597 | -0.389565 |
| 6  | 4.810433  | -2.980956 | 0.829889  |
| 6  | 3.873072  | -1.952179 | 0.912728  |
| 6  | 2.636342  | -0.067004 | -0.456660 |
| 6  | 2.757797  | 0.141672  | -1.986053 |
| 1  | 5.528944  | -2.862495 | -2.503275 |
| 1  | 6.120436  | -4.115673 | -0.437665 |
| 1  | 5.085592  | -3.528360 | 1.723608  |
| 1  | 3.410322  | -1.690094 | 1.855415  |
| 7  | 3.665382  | -0.752801 | -2.455188 |
| 1  | 3.904514  | -0.820971 | -3.431976 |
| 8  | 2.134285  | 0.940309  | -2.658247 |
| 6  | 1.813127  | 3.010440  | -0.220348 |
| 7  | 2.049313  | 1.976397  | 0.785763  |
| 6  | 0.954055  | 1.046920  | 1.015310  |
| 6  | 3.192047  | 1.154999  | 0.390621  |
| 6  | -0.461876 | 1.579596  | 1.052402  |
| 6  | -1.073615 | 1.121052  | 2.219265  |
| 6  | -2.424359 | 1.291725  | 2.464276  |
| 6  | -3.175126 | 1.960005  | 1.499958  |
| 6  | -2.582050 | 2.443393  | 0.338699  |
| 6  | -1.220943 | 2.248268  | 0.107095  |
| 6  | 1.099562  | 0.424961  | 2.436224  |
| 1  | -2.883292 | 0.903449  | 3.364844  |
| 1  | -0.781158 | 2.603698  | -0.816058 |
| 1  | 1.370906  | 2.624113  | -1.143410 |
| 7  | -0.136631 | 0.448649  | 3.007665  |
| 1  | 3.600771  | 0.704344  | 1.292447  |
| 8  | 2.108815  | -0.004092 | 2.948342  |
| 1  | -0.312666 | 0.088692  | 3.932817  |
| 1  | -4.238160 | 2.098288  | 1.658051  |
| 6  | 4.252457  | 2.041555  | -0.270056 |
| 1  | 4.634601  | 1.608201  | -1.194176 |
| 1  | -3.182316 | 2.960329  | -0.399912 |
| 16 | 3.463864  | 3.662239  | -0.599165 |
| 1  | 5.091262  | 2.207496  | 0.402422  |
| 1  | 1.201480  | 3.812009  | 0.191222  |

**13a**

E(RwB97XD) = -2490.90190788 A.U.

|   |          |           |           |
|---|----------|-----------|-----------|
| 6 | 1.023786 | -0.226666 | -0.736599 |
| 1 | 0.623744 | -0.056620 | -1.738792 |
| 6 | 0.284520 | -1.403908 | -0.128217 |
| 8 | 0.845903 | -2.327872 | 0.416329  |

|    |           |           |           |
|----|-----------|-----------|-----------|
| 6  | -4.634741 | -0.378082 | -0.828538 |
| 6  | -5.441560 | -0.748973 | 0.268700  |
| 6  | -3.492170 | -1.378926 | 0.781983  |
| 6  | -1.191003 | -1.311393 | -0.104269 |
| 6  | -2.076569 | -0.780534 | -0.989086 |
| 6  | -6.806074 | -0.459443 | 0.249332  |
| 6  | -7.320467 | 0.192555  | -0.859122 |
| 1  | -8.377841 | 0.427437  | -0.895773 |
| 6  | -5.142776 | 0.284909  | -1.940538 |
| 6  | -6.501620 | 0.560912  | -1.936860 |
| 1  | -6.937484 | 1.074393  | -2.785416 |
| 1  | -7.434497 | -0.740057 | 1.085823  |
| 1  | -4.518725 | 0.580136  | -2.772830 |
| 16 | -1.965219 | -1.958052 | 1.354253  |
| 7  | -3.359281 | -0.804704 | -0.467595 |
| 7  | -4.697699 | -1.375393 | 1.263871  |
| 6  | -1.894940 | -0.325086 | -2.397794 |
| 1  | -2.054595 | 0.750506  | -2.498215 |
| 1  | -0.908497 | -0.571379 | -2.780422 |
| 1  | -2.625835 | -0.840876 | -3.025158 |
| 6  | 3.411675  | -1.095222 | 0.026252  |
| 6  | 4.032744  | -2.150851 | -0.641942 |
| 6  | 4.919473  | -3.004531 | -0.012977 |
| 6  | 5.199843  | -2.764254 | 1.332272  |
| 6  | 4.625450  | -1.690214 | 2.002718  |
| 6  | 3.732122  | -0.842423 | 1.345990  |
| 6  | 2.551867  | -0.350179 | -0.962580 |
| 6  | 2.786383  | -1.128884 | -2.270240 |
| 1  | 5.386242  | -3.823269 | -0.546945 |
| 1  | 5.889433  | -3.417810 | 1.853842  |
| 1  | 4.876643  | -1.504858 | 3.040187  |
| 1  | 3.313865  | 0.020239  | 1.847650  |
| 7  | 3.634069  | -2.153636 | -1.984828 |
| 1  | 3.943113  | -2.816173 | -2.678650 |
| 8  | 2.280942  | -0.880066 | -3.344913 |
| 6  | 2.362561  | 3.086548  | 0.222920  |
| 7  | 2.144691  | 1.670128  | 0.062955  |
| 6  | 0.799780  | 1.125965  | 0.040096  |
| 6  | 2.890585  | 1.151964  | -1.075039 |
| 6  | 0.123966  | 1.065862  | 1.391112  |
| 6  | -1.088809 | 1.751394  | 1.319818  |
| 6  | -1.953158 | 1.836709  | 2.394465  |
| 6  | -1.560420 | 1.221582  | 3.582780  |
| 6  | -0.349766 | 0.544980  | 3.677112  |
| 6  | 0.500182  | 0.459459  | 2.573949  |
| 6  | -0.201572 | 2.001936  | -0.775840 |

|    |           |           |           |
|----|-----------|-----------|-----------|
| 1  | -2.896335 | 2.363187  | 2.317276  |
| 1  | 1.428384  | -0.092122 | 2.643475  |
| 1  | 2.130259  | 3.404518  | 1.239658  |
| 7  | -1.253296 | 2.288368  | 0.036015  |
| 1  | 2.496460  | 1.522552  | -2.032812 |
| 8  | -0.056606 | 2.353649  | -1.927377 |
| 1  | -2.027235 | 2.867532  | -0.251518 |
| 1  | -2.215753 | 1.271808  | 4.444375  |
| 6  | 4.321745  | 1.635201  | -0.897299 |
| 1  | 4.896258  | 0.983110  | -0.242817 |
| 1  | -0.067632 | 0.071737  | 4.609575  |
| 16 | 4.161312  | 3.287035  | -0.099347 |
| 1  | 4.830436  | 1.745490  | -1.853090 |
| 1  | 1.804590  | 3.695330  | -0.498499 |

**14a**

E(RwB97XD) = -2490.86458368 A.U.

|    |           |           |           |
|----|-----------|-----------|-----------|
| 6  | 1.554282  | -0.107125 | -1.203349 |
| 1  | 1.336355  | 0.311442  | -2.182805 |
| 6  | 0.867251  | 0.535152  | -0.020750 |
| 8  | 1.659768  | 0.486139  | 1.146946  |
| 6  | -3.679110 | -1.777546 | -0.076528 |
| 6  | -4.103331 | -2.248187 | 1.186478  |
| 6  | -2.208241 | -1.382278 | 1.519764  |
| 6  | -0.405384 | -0.223838 | 0.287388  |
| 6  | -1.421443 | -0.566232 | -0.531051 |
| 6  | -5.342542 | -2.880887 | 1.304541  |
| 6  | -6.116019 | -3.023474 | 0.165320  |
| 1  | -7.081329 | -3.511534 | 0.234150  |
| 6  | -4.452131 | -1.918662 | -1.225267 |
| 6  | -5.677678 | -2.549511 | -1.081301 |
| 1  | -6.309795 | -2.679083 | -1.951726 |
| 1  | -5.678101 | -3.245724 | 2.267880  |
| 1  | -4.122404 | -1.557570 | -2.189968 |
| 16 | -0.670071 | -0.715289 | 1.970340  |
| 7  | -2.432521 | -1.218250 | 0.174129  |
| 7  | -3.159342 | -1.987290 | 2.171501  |
| 6  | -1.615513 | -0.305407 | -1.984308 |
| 1  | -2.522945 | 0.286176  | -2.136523 |
| 1  | -0.783565 | 0.250282  | -2.406705 |
| 1  | -1.712917 | -1.244650 | -2.534461 |
| 6  | 2.936483  | -2.112566 | -0.268959 |
| 6  | 3.706280  | -3.027056 | -1.010306 |
| 6  | 4.372889  | -4.084564 | -0.419853 |



|    |           |           |           |
|----|-----------|-----------|-----------|
| 6  | 4.256119  | -4.230213 | 0.961533  |
| 6  | 3.494949  | -3.342203 | 1.714981  |
| 6  | 2.831456  | -2.278697 | 1.105802  |
| 6  | 2.373412  | -1.158949 | -1.233703 |
| 6  | 2.883598  | -1.592365 | -2.590829 |
| 1  | 4.961746  | -4.775588 | -1.010708 |
| 1  | 4.767675  | -5.050504 | 1.451827  |
| 1  | 3.417565  | -3.475227 | 2.787384  |
| 1  | 2.253462  | -1.582603 | 1.694995  |
| 7  | 3.664430  | -2.692010 | -2.364851 |
| 1  | 4.133765  | -3.195057 | -3.100316 |
| 8  | 2.654211  | -1.081064 | -3.667623 |
| 6  | 0.307733  | 2.913836  | 2.093975  |
| 7  | 1.227433  | 2.726382  | 0.967948  |
| 6  | 0.652903  | 2.133228  | -0.241158 |
| 6  | 2.253950  | 1.782224  | 1.350964  |
| 6  | -0.733405 | 2.578115  | -0.640117 |
| 6  | -0.665386 | 3.162313  | -1.906050 |
| 6  | -1.786783 | 3.609455  | -2.580141 |
| 6  | -3.018498 | 3.464939  | -1.946416 |
| 6  | -3.111466 | 2.892848  | -0.682220 |
| 6  | -1.968121 | 2.443244  | -0.024420 |
| 6  | 1.516331  | 2.656670  | -1.433633 |
| 1  | -1.707809 | 4.052564  | -3.564969 |
| 1  | -2.064105 | 1.985116  | 0.951199  |
| 1  | -0.362962 | 2.065384  | 2.250202  |
| 7  | 0.659366  | 3.183156  | -2.349121 |
| 1  | 3.111143  | 1.874487  | 0.684691  |
| 8  | 2.721575  | 2.614433  | -1.526028 |
| 1  | 0.976931  | 3.617933  | -3.201530 |
| 1  | -3.916036 | 3.804008  | -2.450112 |
| 6  | 2.624318  | 1.950524  | 2.814464  |
| 1  | 2.607291  | 0.980521  | 3.309285  |
| 1  | -4.077751 | 2.787833  | -0.204916 |
| 16 | 1.387253  | 3.088145  | 3.539901  |
| 1  | 3.611329  | 2.394586  | 2.921653  |
| 1  | -0.273864 | 3.824792  | 1.964906  |

**15a**

E(RwB97XD) = -2490.86471681 A.U.

|   |           |           |           |
|---|-----------|-----------|-----------|
| 6 | -0.891661 | -0.246181 | 0.981341  |
| 1 | -0.363587 | 0.279500  | 1.772774  |
| 6 | -0.335545 | 0.021396  | -0.385542 |
| 8 | -1.036237 | -0.681657 | -1.388261 |

|    |           |           |           |
|----|-----------|-----------|-----------|
| 6  | 4.645608  | -0.824763 | 0.408608  |
| 6  | 5.179881  | -1.866440 | -0.383271 |
| 6  | 3.142314  | -1.744782 | -0.918448 |
| 6  | 1.112093  | -0.446015 | -0.385236 |
| 6  | 2.165646  | -0.032052 | 0.348255  |
| 6  | 6.530749  | -2.199342 | -0.262680 |
| 6  | 7.303282  | -1.487151 | 0.638627  |
| 1  | 8.354157  | -1.729089 | 0.747983  |
| 6  | 5.417791  | -0.105661 | 1.316470  |
| 6  | 6.755142  | -0.455380 | 1.416937  |
| 1  | 7.389722  | 0.080783  | 2.112560  |
| 1  | 6.950728  | -2.996158 | -0.864787 |
| 1  | 5.005623  | 0.690570  | 1.921357  |
| 16 | 1.499614  | -1.782372 | -1.476228 |
| 7  | 3.308680  | -0.770343 | 0.035318  |
| 7  | 4.213776  | -2.427134 | -1.207996 |
| 6  | 2.266078  | 1.043366  | 1.375547  |
| 1  | 2.993573  | 1.798122  | 1.065832  |
| 1  | 1.314144  | 1.545298  | 1.531597  |
| 1  | 2.589154  | 0.625175  | 2.332233  |
| 6  | -2.947490 | -1.877599 | 0.891516  |
| 6  | -3.781951 | -2.221298 | 1.970826  |
| 6  | -4.881295 | -3.046927 | 1.825872  |
| 6  | -5.144931 | -3.555574 | 0.555367  |
| 6  | -4.319677 | -3.251838 | -0.522338 |
| 6  | -3.216328 | -2.417134 | -0.358884 |
| 6  | -1.904952 | -0.992058 | 1.429786  |
| 6  | -2.180870 | -0.892762 | 2.917551  |
| 1  | -5.510721 | -3.292890 | 2.672319  |
| 1  | -6.001081 | -4.204732 | 0.412333  |
| 1  | -4.531959 | -3.669874 | -1.499047 |
| 1  | -2.560008 | -2.197446 | -1.185119 |
| 7  | -3.313238 | -1.624152 | 3.141399  |
| 1  | -3.729898 | -1.729610 | 4.052307  |
| 8  | -1.550910 | -0.270937 | 3.748623  |
| 6  | -2.953768 | 1.464841  | -1.291975 |
| 7  | -1.587080 | 1.493956  | -1.833434 |
| 6  | -0.526161 | 1.568937  | -0.822899 |
| 6  | -1.328368 | 0.228386  | -2.475722 |
| 6  | -0.729860 | 2.597737  | 0.267662  |
| 6  | 0.264070  | 3.572025  | 0.150940  |
| 6  | 0.361908  | 4.642419  | 1.020242  |
| 6  | -0.582020 | 4.731826  | 2.040520  |
| 6  | -1.581478 | 3.775646  | 2.177012  |
| 6  | -1.659401 | 2.702299  | 1.291133  |
| 6  | 0.735517  | 2.127811  | -1.563532 |

|    |           |           |           |
|----|-----------|-----------|-----------|
| 1  | 1.146123  | 5.381081  | 0.911099  |
| 1  | -2.438360 | 1.963437  | 1.420975  |
| 1  | -3.304538 | 2.475222  | -1.091932 |
| 7  | 1.107065  | 3.264787  | -0.916710 |
| 1  | -0.441988 | 0.300202  | -3.104351 |
| 8  | 1.265441  | 1.668125  | -2.548223 |
| 1  | 1.877350  | 3.835459  | -1.228492 |
| 1  | -0.530643 | 5.559354  | 2.738212  |
| 6  | -2.544747 | -0.224316 | -3.256621 |
| 1  | -2.422059 | 0.012557  | -4.311335 |
| 1  | -2.304663 | 3.858301  | 2.978568  |
| 16 | -3.967835 | 0.722148  | -2.602243 |
| 1  | -2.695552 | -1.296847 | -3.149784 |
| 1  | -3.042207 | 0.854639  | -0.389291 |

**16a**

E(RwB97XD) = -2490.86101783 A.U.

|    |           |           |           |
|----|-----------|-----------|-----------|
| 6  | -0.382226 | 1.425577  | -1.558459 |
| 1  | -0.532117 | 1.504056  | -2.632028 |
| 6  | -0.540895 | 0.046982  | -0.954402 |
| 8  | -1.481551 | 0.069974  | 0.126446  |
| 6  | 4.320192  | -1.101939 | 0.094746  |
| 6  | 4.495114  | -1.864481 | 1.271391  |
| 6  | 2.414967  | -1.555325 | 1.108926  |
| 6  | 0.764375  | -0.436558 | -0.360545 |
| 6  | 2.022334  | -0.294565 | -0.827368 |
| 6  | 5.781431  | -2.238166 | 1.665406  |
| 6  | 6.848786  | -1.839005 | 0.879275  |
| 1  | 7.856116  | -2.117150 | 1.166798  |
| 6  | 5.389871  | -0.694408 | -0.696981 |
| 6  | 6.656166  | -1.077534 | -0.284137 |
| 1  | 7.515434  | -0.779947 | -0.873295 |
| 1  | 5.926831  | -2.823138 | 2.565626  |
| 1  | 5.252656  | -0.103223 | -1.592149 |
| 16 | 0.690230  | -1.367569 | 1.147501  |
| 7  | 2.945344  | -0.917576 | 0.014110  |
| 7  | 3.280453  | -2.134412 | 1.889506  |
| 6  | 2.513667  | 0.359419  | -2.073288 |
| 1  | 3.130961  | -0.340979 | -2.641348 |
| 1  | 1.691226  | 0.677199  | -2.708564 |
| 1  | 3.118670  | 1.238523  | -1.834968 |
| 6  | 0.235773  | 2.952287  | 0.439967  |
| 6  | 0.609068  | 4.307141  | 0.406883  |
| 6  | 0.975965  | 4.998501  | 1.546261  |

|    |           |           |           |
|----|-----------|-----------|-----------|
| 6  | 0.958438  | 4.303996  | 2.755596  |
| 6  | 0.575327  | 2.967546  | 2.813357  |
| 6  | 0.206154  | 2.284705  | 1.655778  |
| 6  | -0.067412 | 2.563181  | -0.939189 |
| 6  | 0.118694  | 3.808578  | -1.773826 |
| 1  | 1.263119  | 6.041891  | 1.501111  |
| 1  | 1.241868  | 4.820990  | 3.665168  |
| 1  | 0.557536  | 2.452748  | 3.766385  |
| 1  | -0.115620 | 1.254820  | 1.709878  |
| 7  | 0.533567  | 4.782276  | -0.903885 |
| 1  | 0.739713  | 5.725620  | -1.190246 |
| 8  | -0.039305 | 3.933787  | -2.970543 |
| 6  | -2.029206 | -2.880098 | -0.837969 |
| 7  | -2.349209 | -1.527062 | -1.289877 |
| 6  | -2.696527 | -0.549887 | -0.288010 |
| 6  | -1.219700 | -0.932586 | -2.011855 |
| 6  | -3.511378 | -1.016415 | 0.886618  |
| 6  | -4.767020 | -0.412992 | 0.821397  |
| 6  | -5.740806 | -0.650609 | 1.773720  |
| 6  | -5.416914 | -1.508743 | 2.824039  |
| 6  | -4.158906 | -2.093979 | 2.919283  |
| 6  | -3.191507 | -1.844375 | 1.946084  |
| 6  | -3.651724 | 0.492219  | -0.962875 |
| 1  | -6.714040 | -0.180012 | 1.712456  |
| 1  | -2.208714 | -2.291167 | 2.029319  |
| 1  | -1.358446 | -2.908919 | 0.025590  |
| 7  | -4.831685 | 0.439788  | -0.286516 |
| 1  | -1.617767 | -0.301382 | -2.804711 |
| 8  | -3.392511 | 1.191184  | -1.915032 |
| 1  | -5.621122 | 1.022188  | -0.518723 |
| 1  | -6.160638 | -1.712307 | 3.585596  |
| 6  | -0.351183 | -2.045724 | -2.612144 |
| 1  | 0.644253  | -2.063921 | -2.172648 |
| 1  | -3.926530 | -2.743551 | 3.753912  |
| 16 | -1.202330 | -3.626080 | -2.263997 |
| 1  | -0.258052 | -1.936739 | -3.690461 |
| 1  | -2.939633 | -3.434315 | -0.615182 |

**17a**

E(RwB97XD) = -2490.86283481 A.U.

|   |          |           |           |
|---|----------|-----------|-----------|
| 6 | 0.516611 | 0.628838  | 1.416388  |
| 1 | 0.654447 | 0.498262  | 2.487343  |
| 6 | 0.214686 | -0.601408 | 0.591482  |
| 8 | 1.046680 | -0.618786 | -0.574058 |

|    |           |           |           |
|----|-----------|-----------|-----------|
| 6  | -4.844171 | -0.301132 | 0.007410  |
| 6  | -5.319539 | -0.894282 | -1.183995 |
| 6  | -3.227129 | -1.165054 | -1.220499 |
| 6  | -1.217727 | -0.642556 | 0.123312  |
| 6  | -2.342278 | -0.198115 | 0.724249  |
| 6  | -6.687844 | -0.881693 | -1.461906 |
| 6  | -7.536619 | -0.280211 | -0.548445 |
| 1  | -8.602384 | -0.258712 | -0.744618 |
| 6  | -5.693241 | 0.305160  | 0.928796  |
| 6  | -7.046693 | 0.304662  | 0.629657  |
| 1  | -7.739856 | 0.767198  | 1.322187  |
| 1  | -7.062242 | -1.333752 | -2.372563 |
| 1  | -5.327165 | 0.759709  | 1.839251  |
| 16 | -1.529952 | -1.458147 | -1.422440 |
| 7  | -3.468696 | -0.495635 | -0.045619 |
| 7  | -4.282216 | -1.428951 | -1.936951 |
| 6  | -2.546795 | 0.504753  | 2.023308  |
| 1  | -1.612211 | 0.653898  | 2.555046  |
| 1  | -2.998962 | 1.486014  | 1.856163  |
| 1  | -3.215970 | -0.077665 | 2.661621  |
| 6  | 0.559568  | 2.553752  | -0.318896 |
| 6  | 0.824372  | 3.914843  | -0.087333 |
| 6  | 0.793615  | 4.854335  | -1.100527 |
| 6  | 0.480688  | 4.407201  | -2.383674 |
| 6  | 0.209238  | 3.065489  | -2.634035 |
| 6  | 0.247814  | 2.128938  | -1.603248 |
| 6  | 0.667615  | 1.878064  | 0.975977  |
| 6  | 1.017207  | 2.953365  | 1.980767  |
| 1  | 1.002519  | 5.898767  | -0.904681 |
| 1  | 0.449072  | 5.121856  | -3.198034 |
| 1  | -0.031770 | 2.743693  | -3.639891 |
| 1  | 0.051919  | 1.085707  | -1.804597 |
| 7  | 1.098386  | 4.118199  | 1.267857  |
| 1  | 1.311885  | 5.008182  | 1.688552  |
| 8  | 1.192740  | 2.821045  | 3.173996  |
| 6  | 2.860736  | -1.282262 | 2.063029  |
| 7  | 2.100860  | -1.958910 | 1.009643  |
| 6  | 2.199597  | -1.429663 | -0.340875 |
| 6  | 0.663549  | -1.923554 | 1.285119  |
| 6  | 3.483028  | -0.744550 | -0.724372 |
| 6  | 4.160684  | -1.558180 | -1.631410 |
| 6  | 5.377448  | -1.187370 | -2.174095 |
| 6  | 5.896176  | 0.052059  | -1.799816 |
| 6  | 5.208610  | 0.894109  | -0.931582 |
| 6  | 3.984553  | 0.499623  | -0.392430 |
| 6  | 2.183897  | -2.667821 | -1.295918 |

|    |           |           |           |
|----|-----------|-----------|-----------|
| 1  | 5.899154  | -1.826276 | -2.875869 |
| 1  | 3.433230  | 1.163354  | 0.263252  |
| 1  | 2.889504  | -0.195205 | 1.961079  |
| 7  | 3.401286  | -2.703136 | -1.906734 |
| 1  | 0.186947  | -2.738780 | 0.738729  |
| 8  | 1.278869  | -3.457003 | -1.427692 |
| 1  | 3.652870  | -3.408545 | -2.581274 |
| 1  | 6.847429  | 0.369693  | -2.210755 |
| 6  | 0.424715  | -2.077156 | 2.779153  |
| 1  | -0.360340 | -1.410051 | 3.136752  |
| 1  | 5.621115  | 1.862838  | -0.678412 |
| 16 | 2.015179  | -1.713695 | 3.617463  |
| 1  | 0.139699  | -3.099157 | 3.016726  |
| 1  | 3.879612  | -1.665664 | 2.094721  |
